# Supplementary material for: Two RNA-binding proteins mediate the sorting of miR223 from mitochondria into exosomes
Source: eLife. 2023 Jul 25;12:e85878. doi: 10.7554/eLife.85878 (PMC10403255; doi:10.7554/eLife.85878)
Supplement: Figure 4—source data 1. [file elife-85878-fig4-data1.zip]

Archive with 15 entries (15 files):
- Figure 4a-source data 1.tif
- Figure 4a-source data 2.pdf
- Figure 4b-source data 1.tif
- Figure 4b-source data 2.pdf
- Figure 4e-source data 1.tif
- Figure 4e-source data 2.tif
- Figure 4e-source data 3.tif
- Figure 4e-source data 4.pdf
- Figure 4f-source data 1.tif
- Figure 4f-source data 2.tif
- Figure 4f-source data 3.pdf
- Figure 4h-source data 1.tif
- Figure 4h-source data 2.pdf
- Figure 4i-source data 1.tif
- Figure 4i-source data 2.pdf
