# Supplementary material for: Two RNA-binding proteins mediate the sorting of miR223 from mitochondria into exosomes
Source: eLife journal article supplement (doi:10.7554/elife.85878), 2023-07-25
Supplement: supp [file elife-85878-supp-v1.zip]

Archive with 18 entries (18 files):
- elife_poa_e85878_Figure_1_figure_supplement_1.pdf
- elife_poa_e85878_Figure_1_figure_supplement_2.pdf
- elife_poa_e85878_Figure_2_figure_supplement_1.pdf
- elife_poa_e85878_Figure_3_figure_supplement_1.pdf
- elife_poa_e85878_Figure_3_figure_supplement_2.pdf
- elife_poa_e85878_Figure_4_figure_supplement_1.pdf
- elife_poa_e85878_Figure_4_figure_supplement_2.pdf
- elife_poa_e85878_Figure_5_figure_supplement_1.pdf
- elife_poa_e85878_Figure_1_source_data_1.zip
- elife_poa_e85878_Figure_1_figure_supplement_2_source_data_1.zip
- elife_poa_e85878_Figure_2_source_data_1.zip
- elife_poa_e85878_Figure_2_figure_supplement_1_source_data_1.zip
- elife_poa_e85878_Figure_3_source_data_1.zip
- elife_poa_e85878_Figure_3_figure_supplement_1_source_data_1.zip
- elife_poa_e85878_Figure_4_source_data_1.zip
- elife_poa_e85878_Figure_4_figure_supplement_1_source_data_1.zip
- elife_poa_e85878_Figure_4_figure_supplement_2_source_data_1.zip
- elife_poa_e85878_Figure_5_source_data_1.zip
