# Supplementary material for: Two RNA-binding proteins mediate the sorting of miR223 from mitochondria into exosomes
Source: eLife journal article supplement (doi:10.7554/elife.85878), 2023-07-25

Figure 1-figure supplement 2. Purified YBX1 full length protein and different truncations and mutation

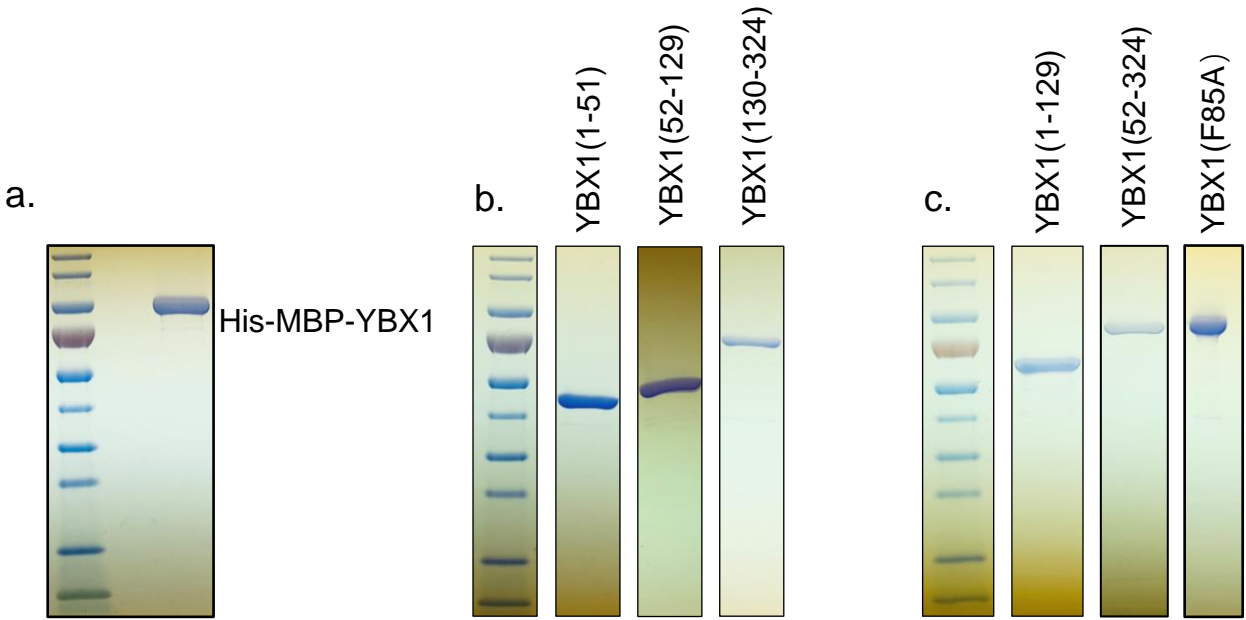

Supplement: supp [file elife-85878-supp-v1.zip]
