# Supplementary figures and images for: Two RNA-binding proteins mediate the sorting of miR223 from mitochondria into exosomes
Source: eLife journal article supplement (doi:10.7554/elife.85878), 2023-07-25

Figure 3d.

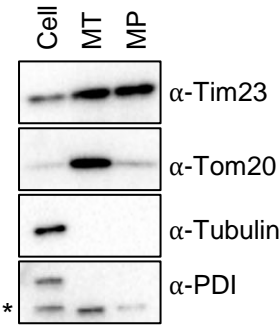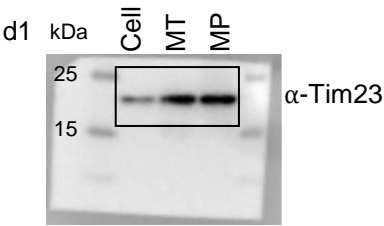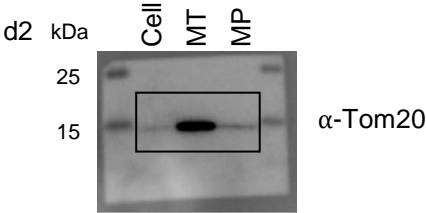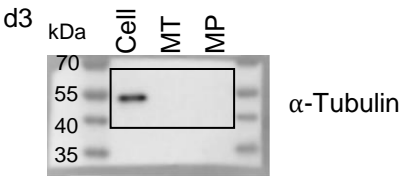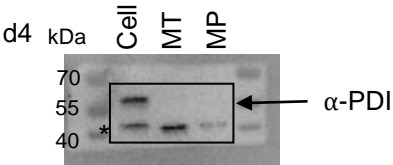

Supplement: supp [file elife-85878-supp-v1.zip]

Figure 4-figure supplement 1a

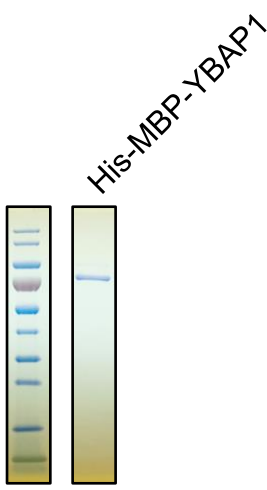

1a1.

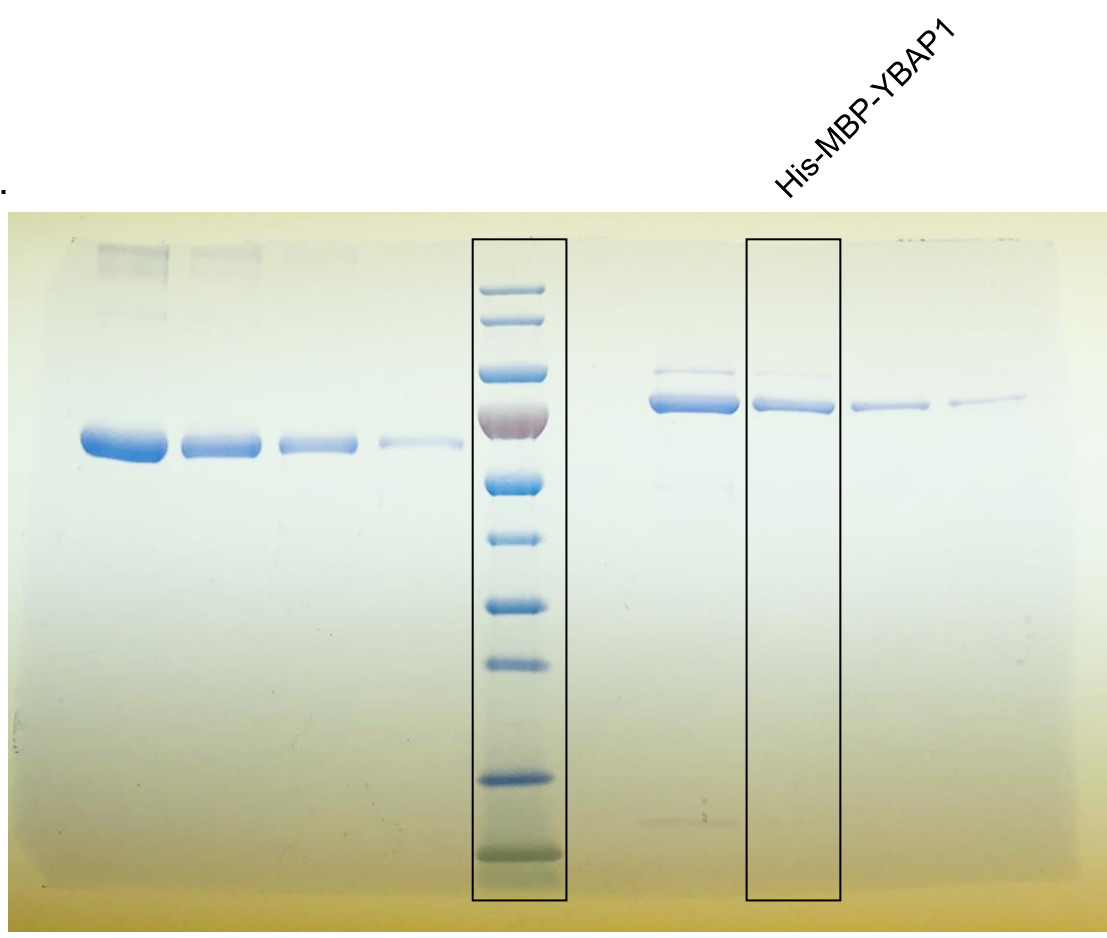

Supplement: supp [file elife-85878-supp-v1.zip]

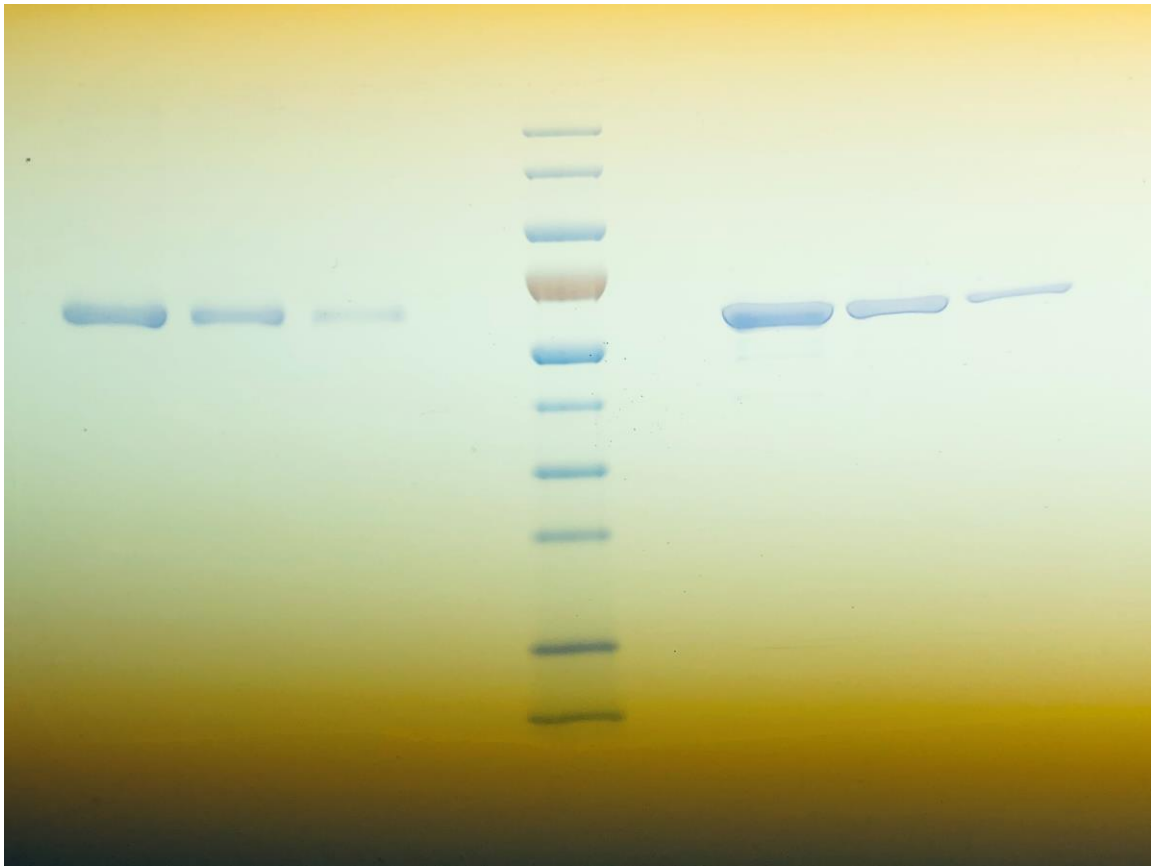

Supplement: supp [file elife-85878-supp-v1.zip]

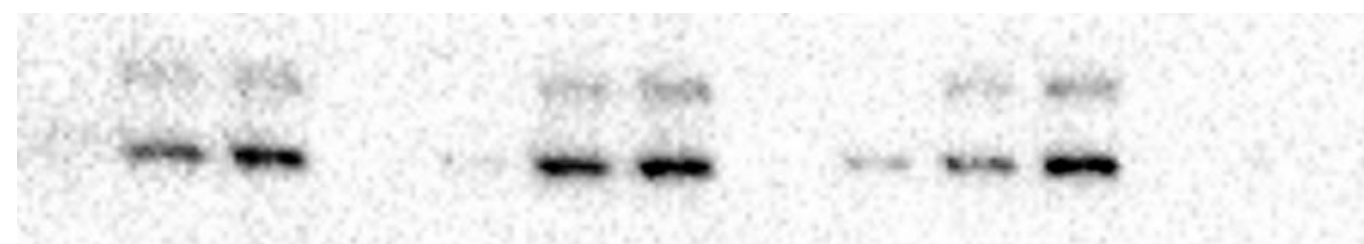

Supplement: supp [file elife-85878-supp-v1.zip]

Figure 1-figure supplement 1. Knockout of YBX1 did not change  
exosome secretion.

a.

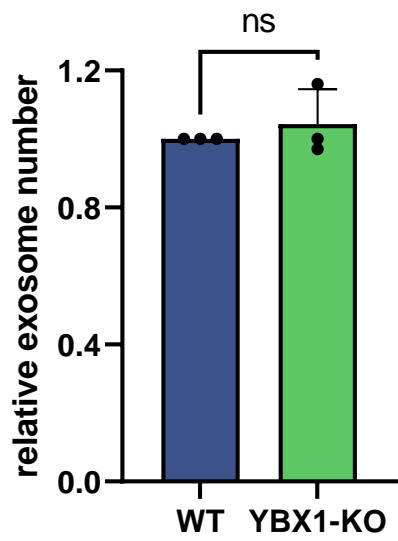

Supplement: supp [file elife-85878-supp-v1.zip]

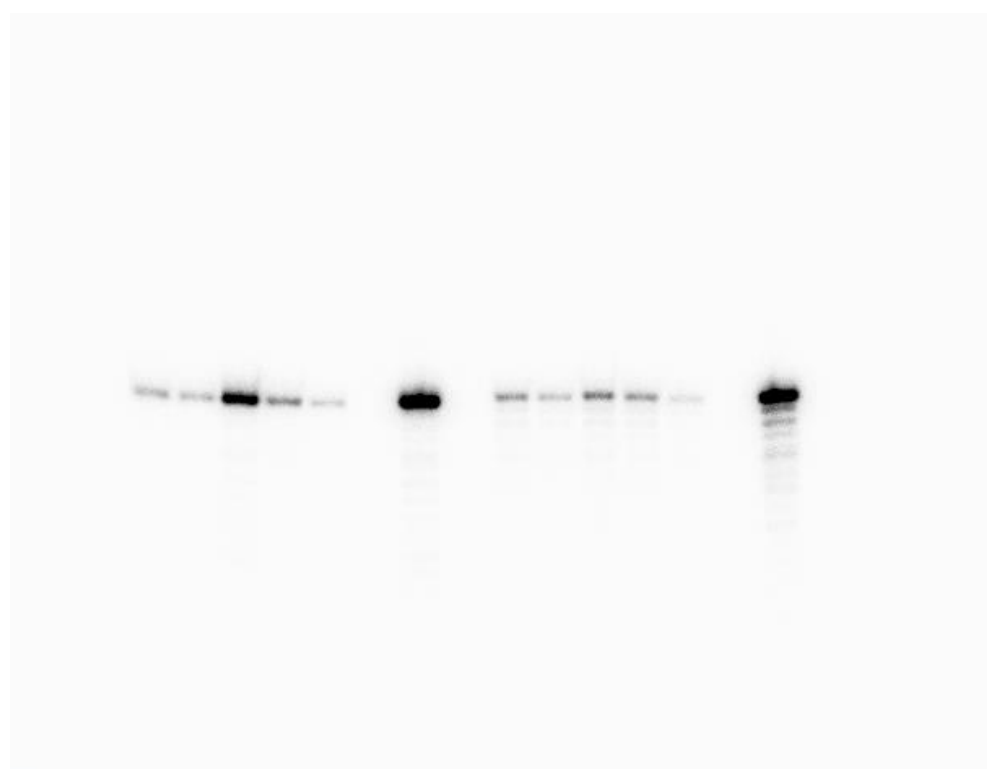

Supplement: supp [file elife-85878-supp-v1.zip]

Figure 2-figure supplement 1f

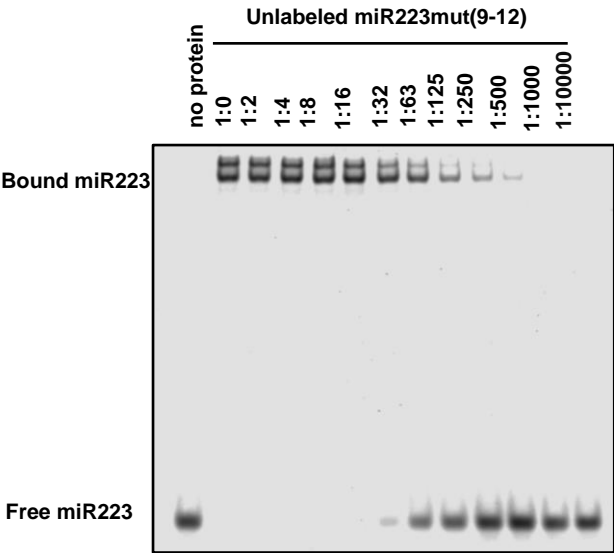

f1.

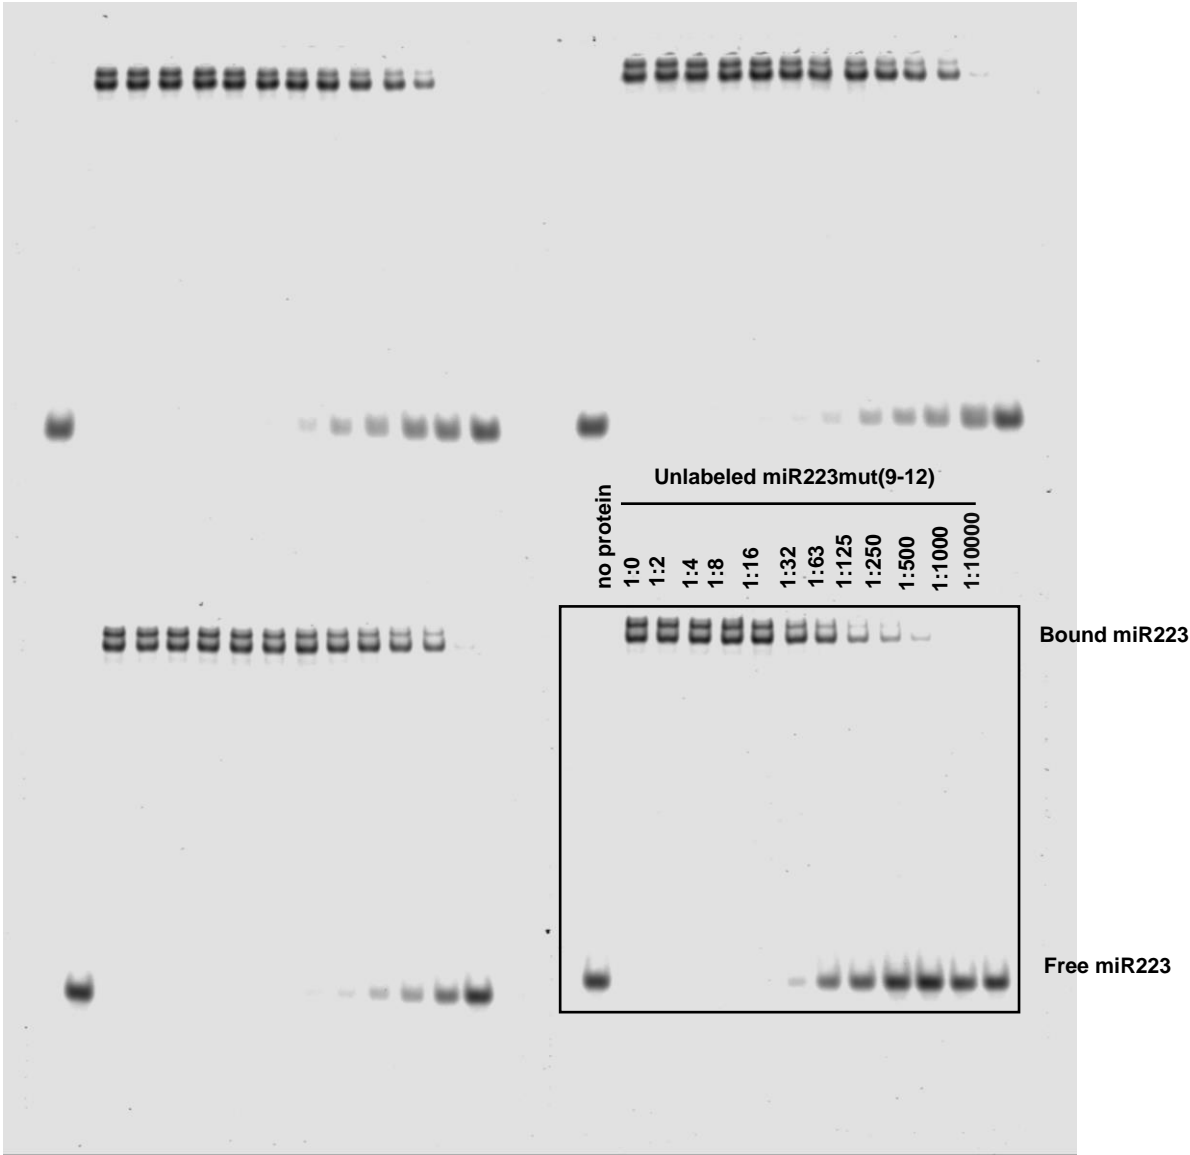

Supplement: supp [file elife-85878-supp-v1.zip]

Figure 2b.

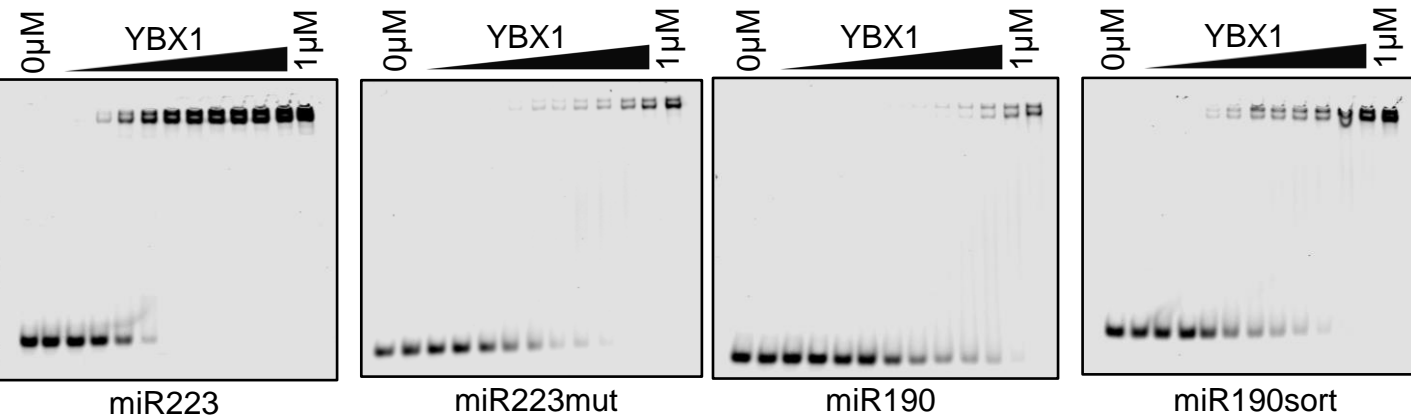

b1.

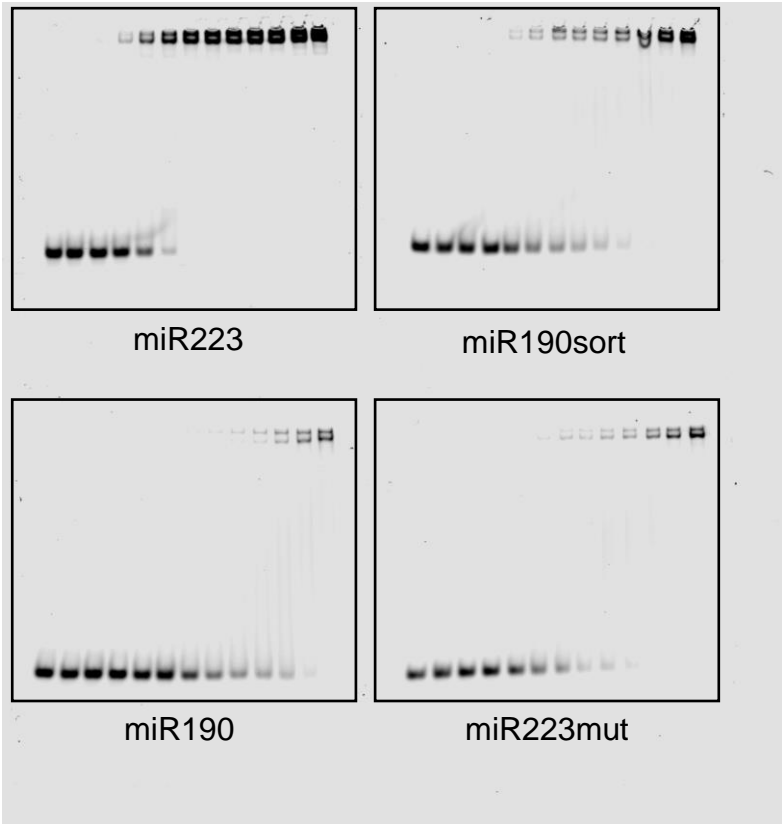

Supplement: supp [file elife-85878-supp-v1.zip]

Figure 1f.

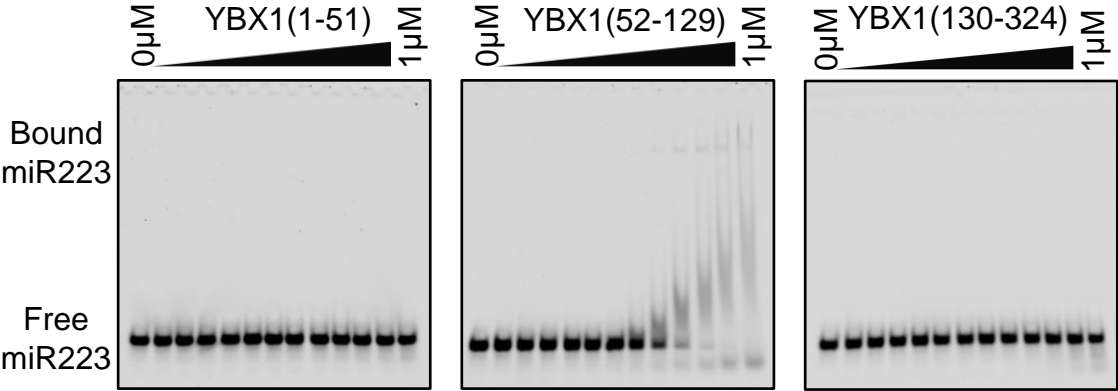

f1

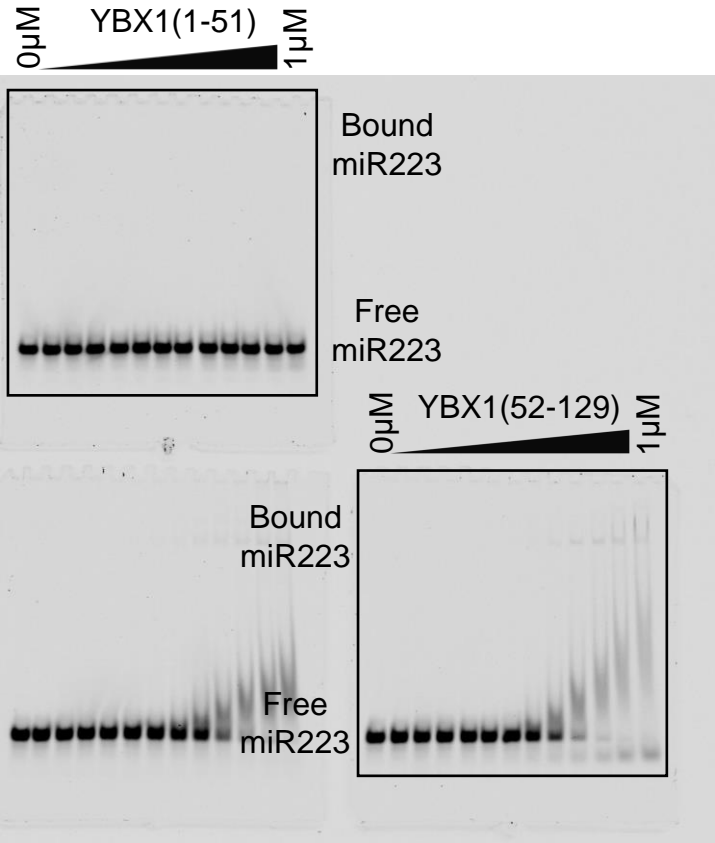

f2

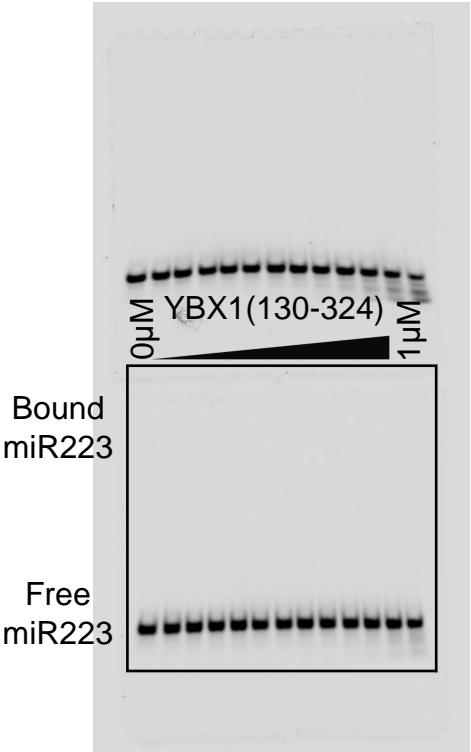

Supplement: supp [file elife-85878-supp-v1.zip]

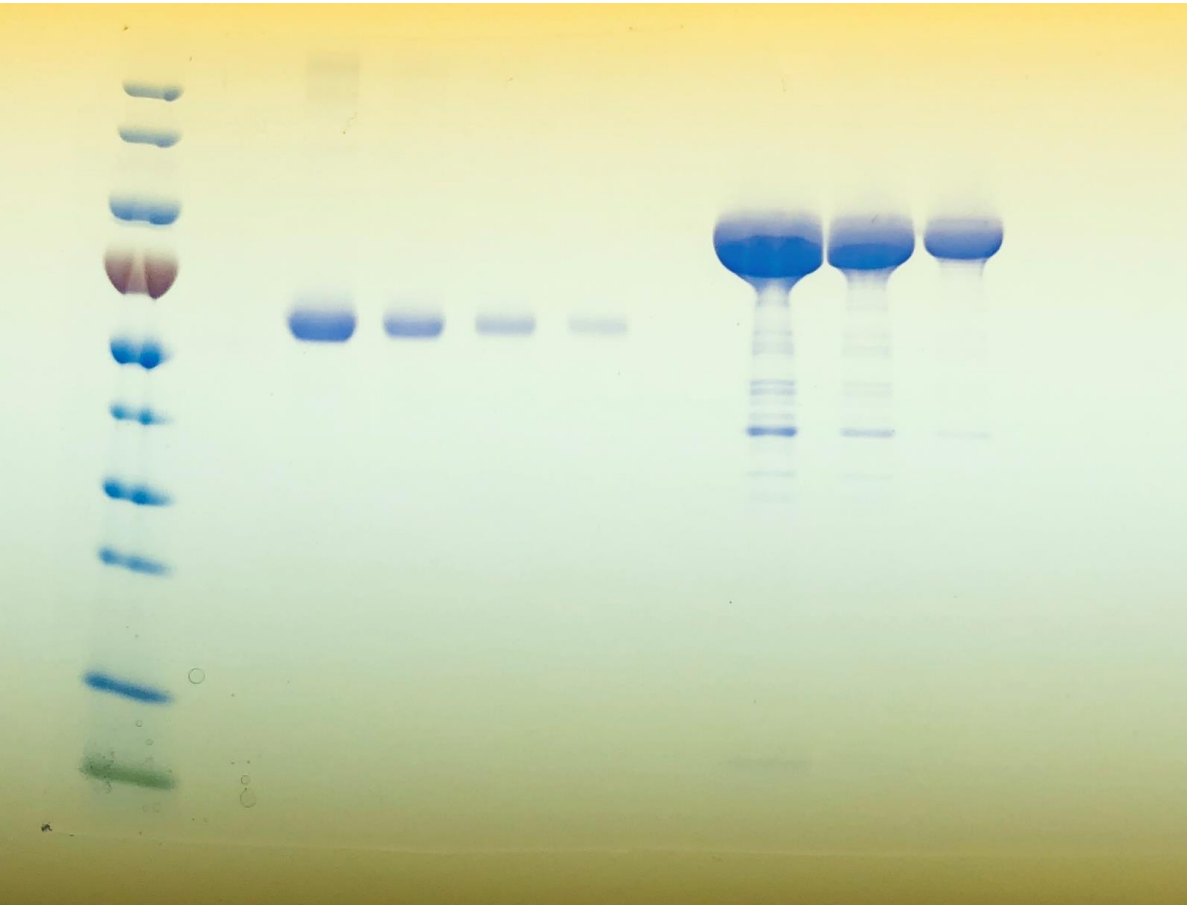

Supplement: supp [file elife-85878-supp-v1.zip]

Figure 3b.

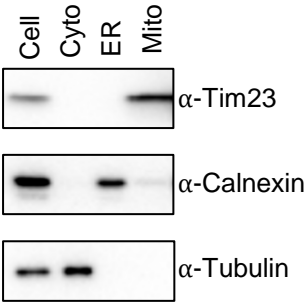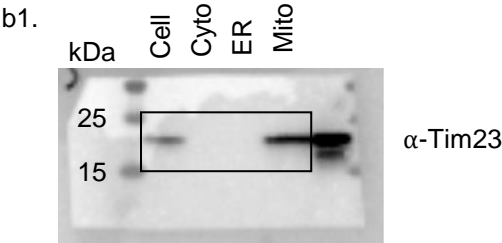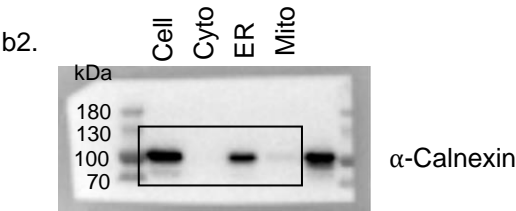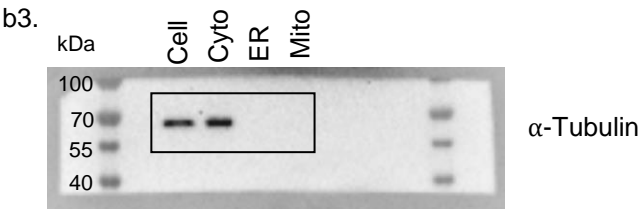

Supplement: supp [file elife-85878-supp-v1.zip]

Figure 4e

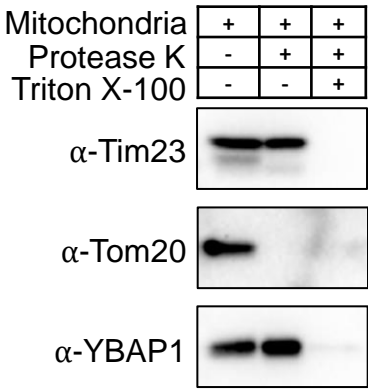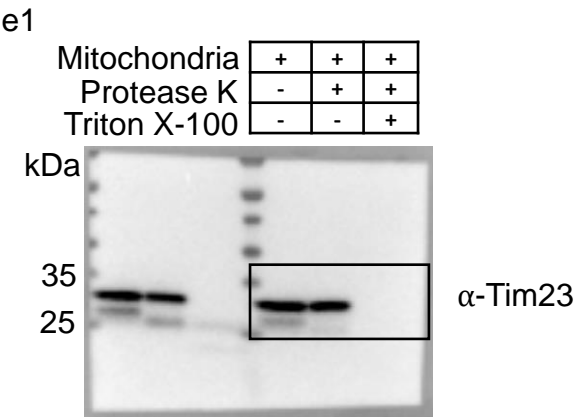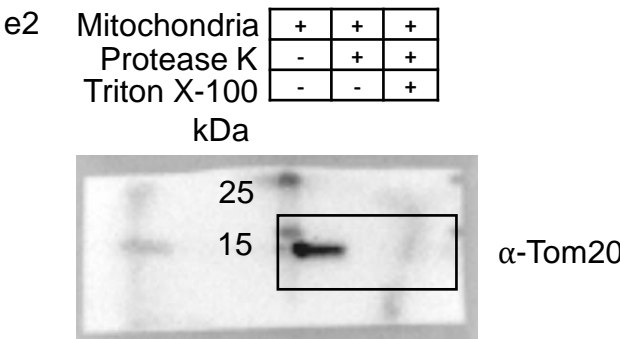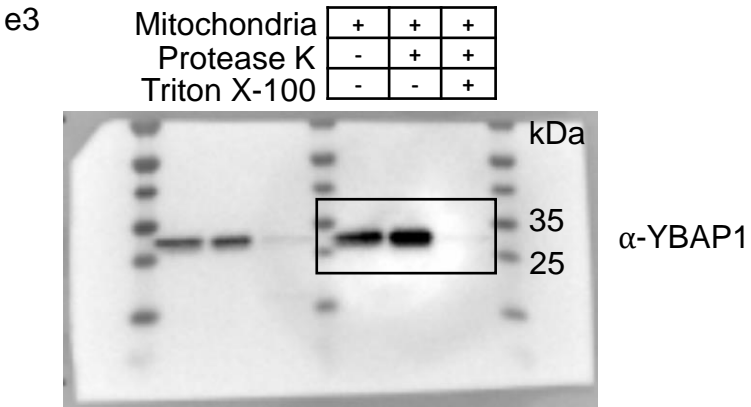

Supplement: supp [file elife-85878-supp-v1.zip]

Figure 5b

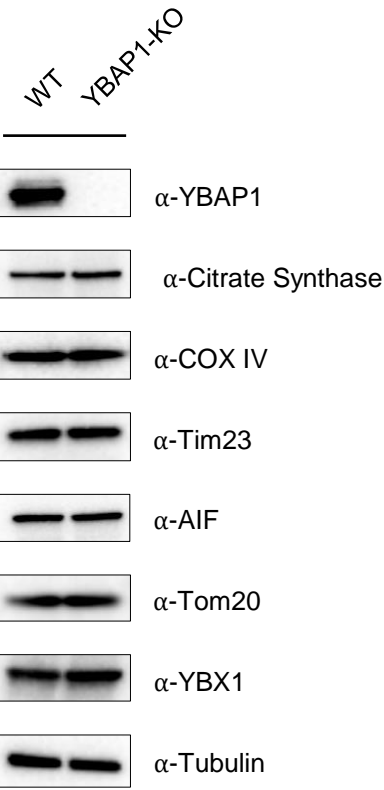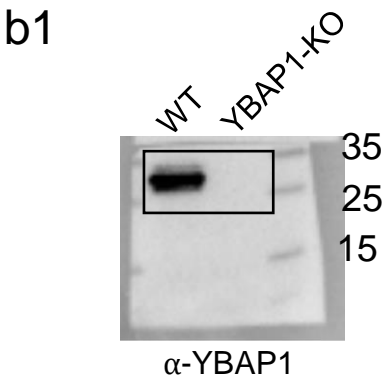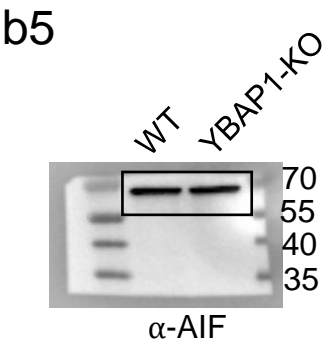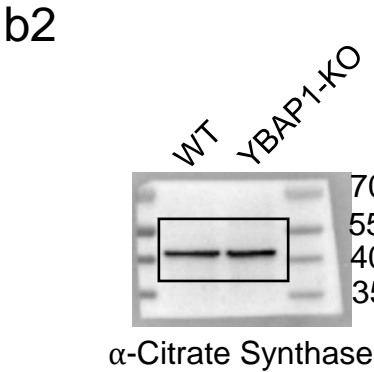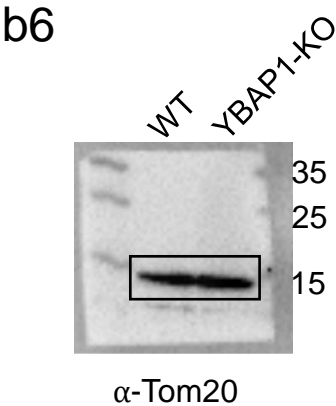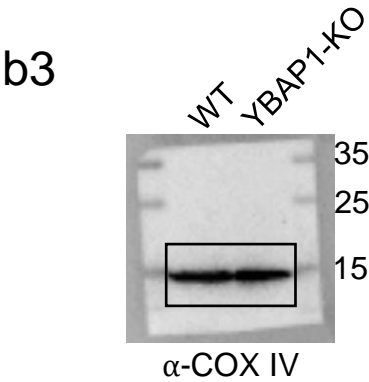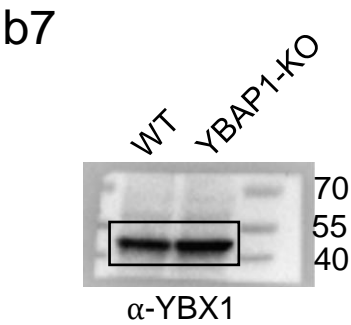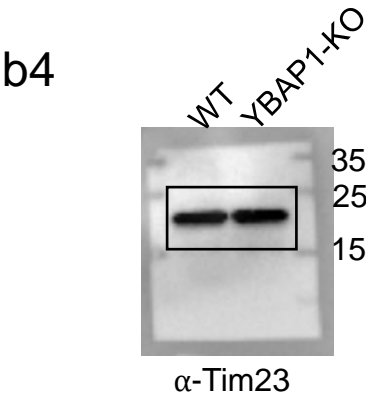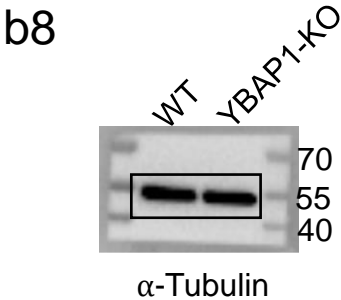

Supplement: supp [file elife-85878-supp-v1.zip]

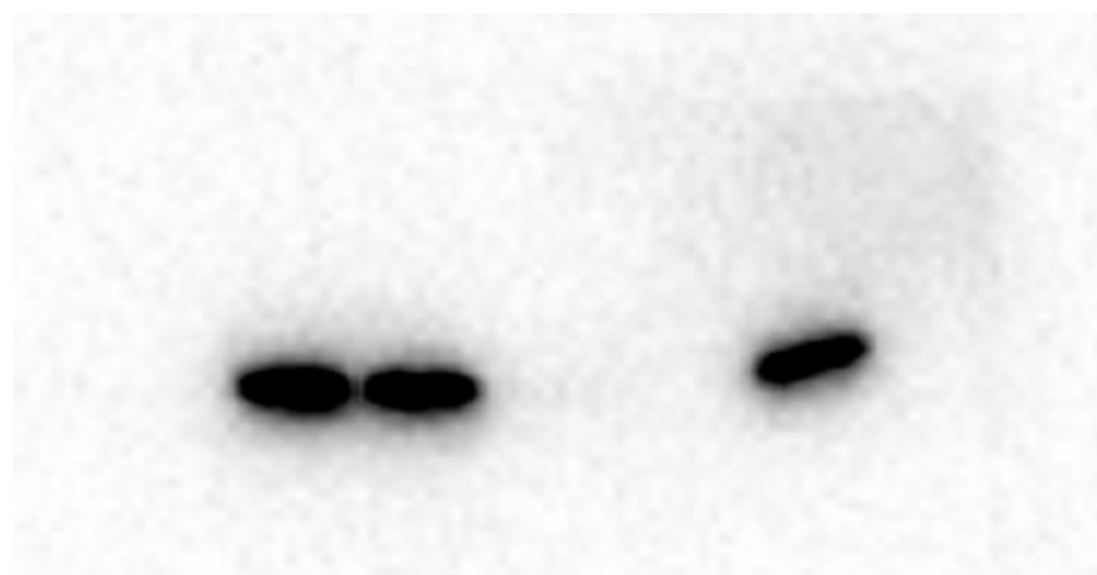

Supplement: supp [file elife-85878-supp-v1.zip]

Figure 4a

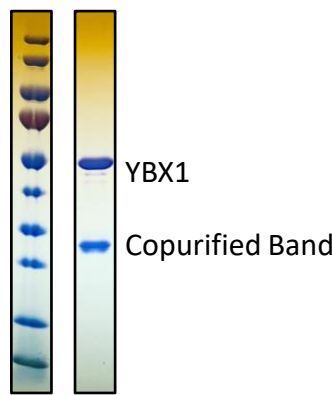

a1

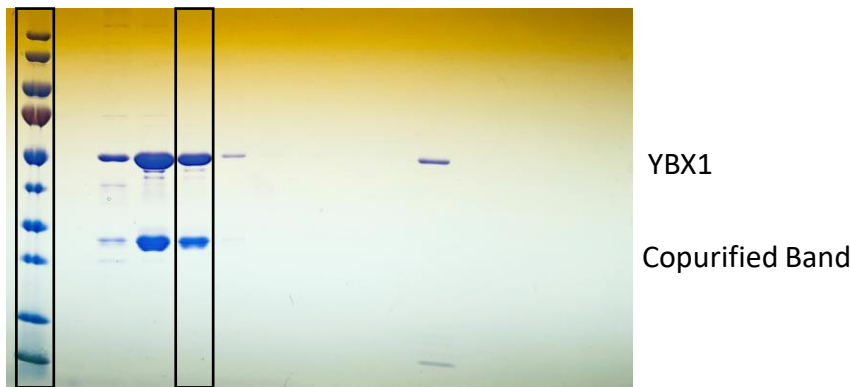

Supplement: supp [file elife-85878-supp-v1.zip]

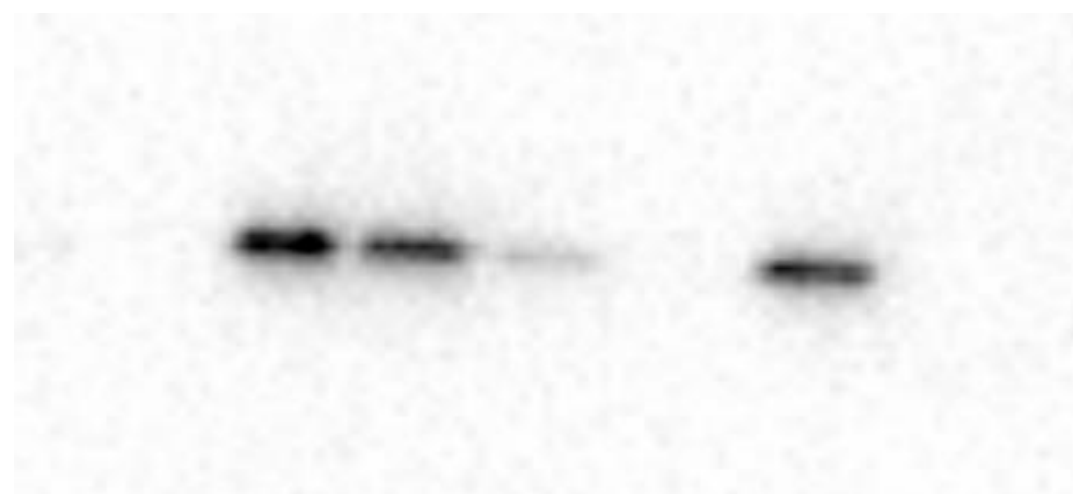

Supplement: supp [file elife-85878-supp-v1.zip]

Figure 2g.

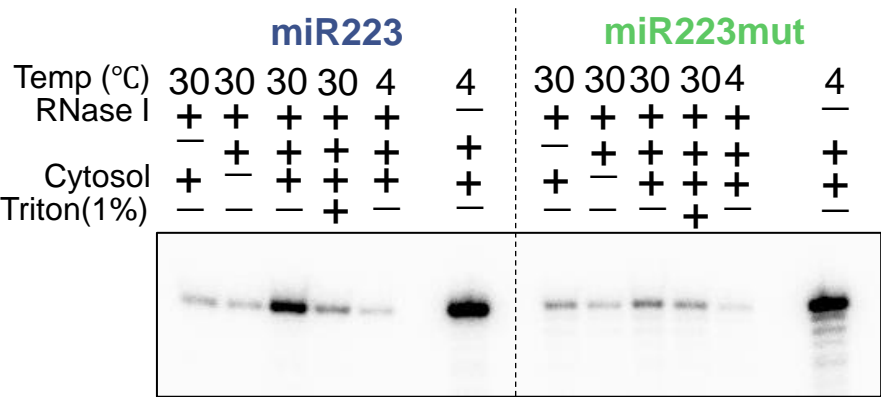

g1.

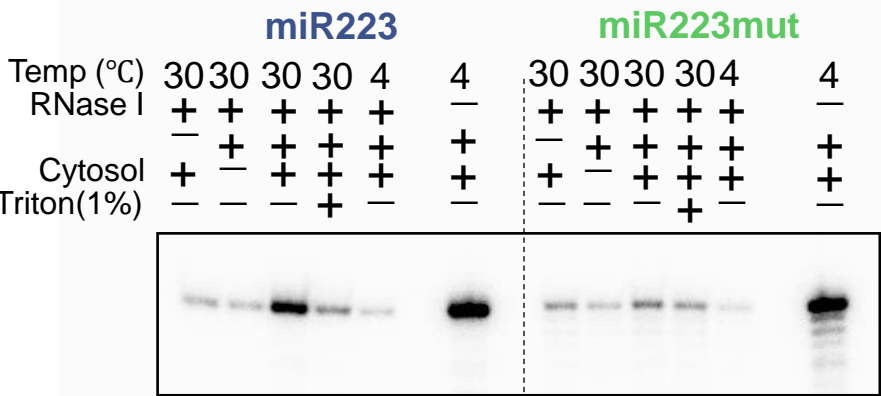

Supplement: supp [file elife-85878-supp-v1.zip]

Figure 3e.

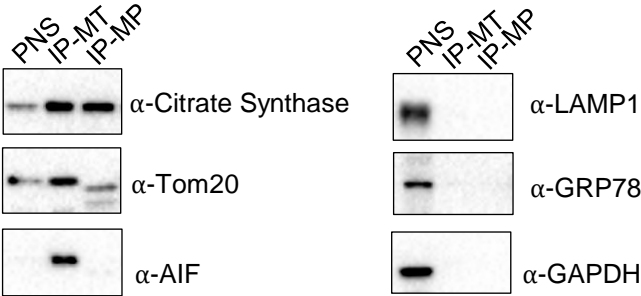

e1

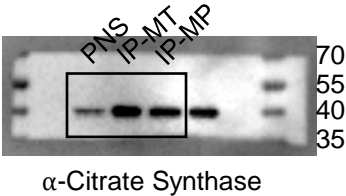

e4

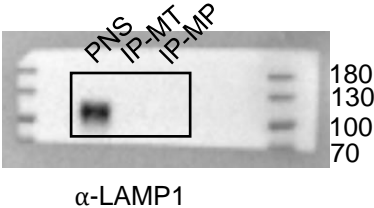

e2

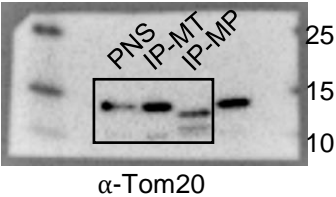

e5

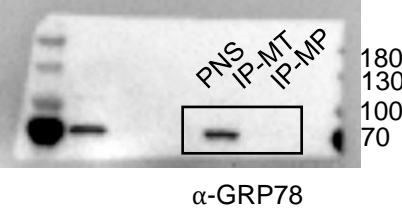

e3

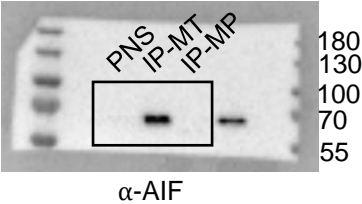

e6

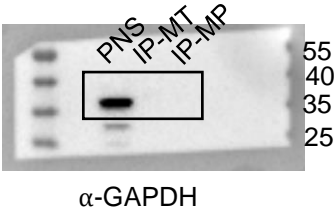

Supplement: supp [file elife-85878-supp-v1.zip]

Figure 2-figure supplement 1a

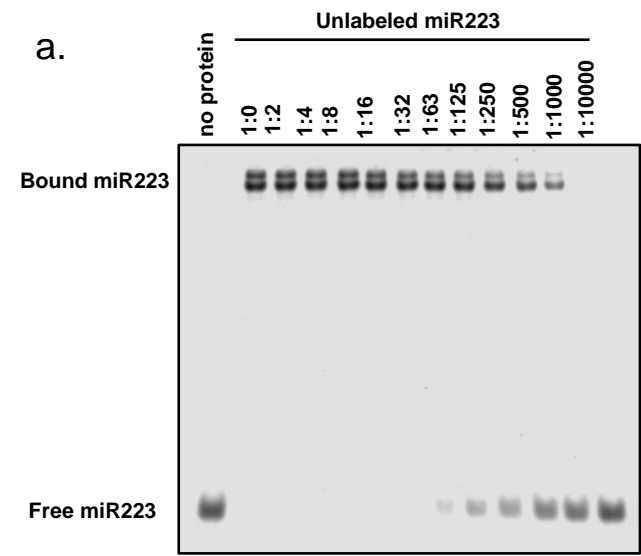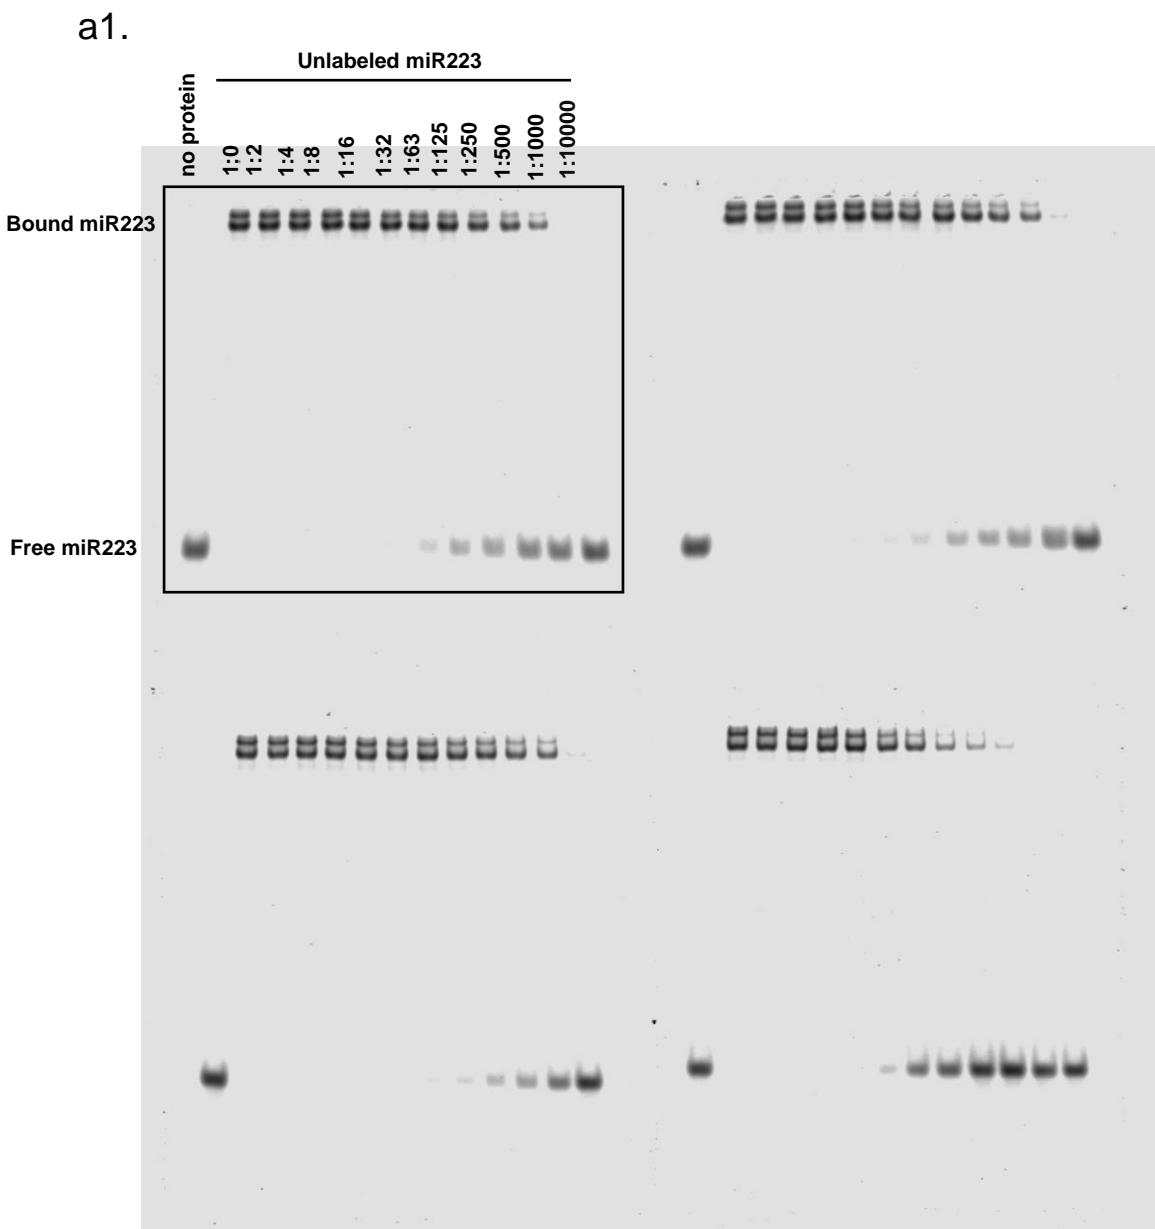

Supplement: supp [file elife-85878-supp-v1.zip]

Figure 2-figure supplement 1. Screening exosomal sorting motif of miR223

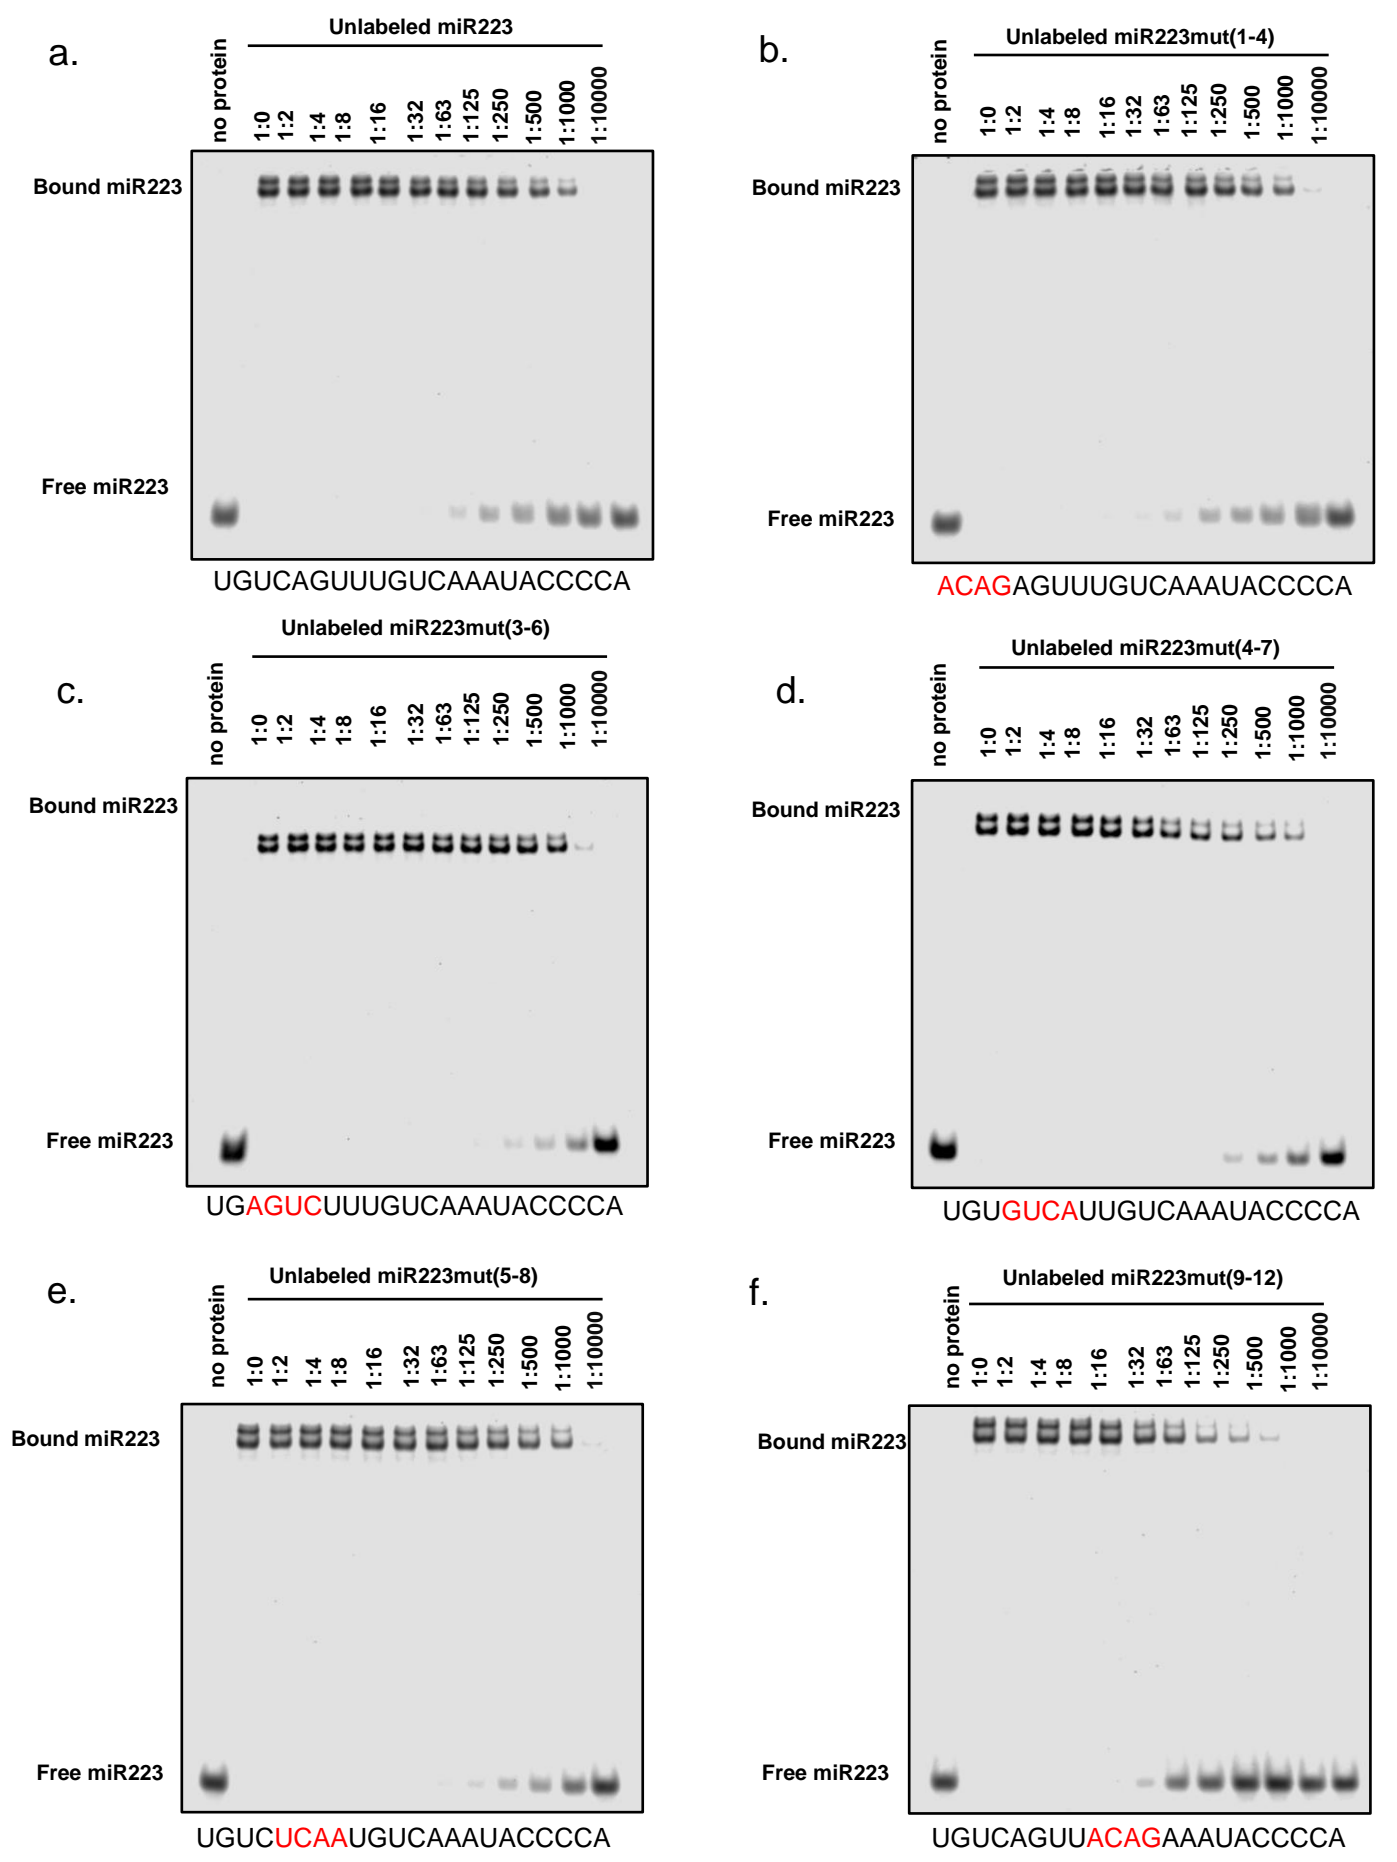

Supplement: supp [file elife-85878-supp-v1.zip]

Figure 2-figure supplement 1b

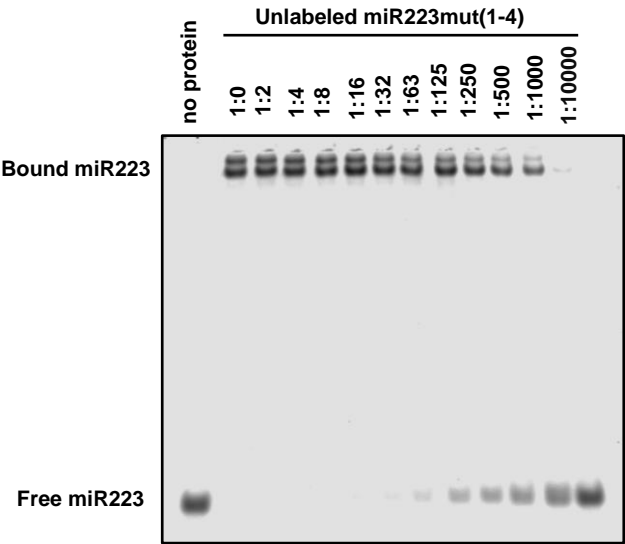

b1.

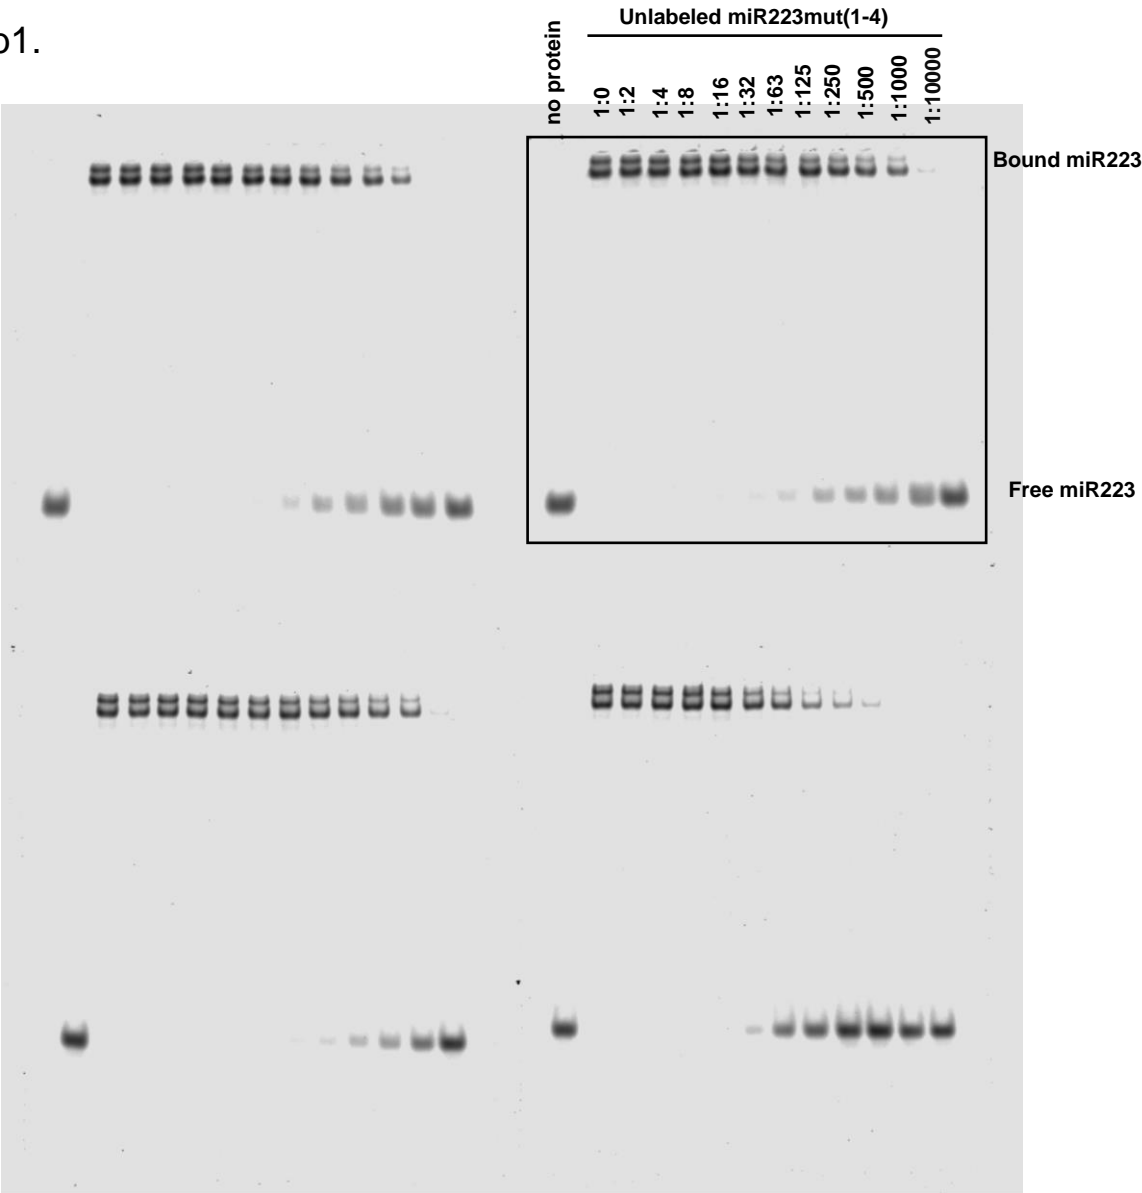

Supplement: supp [file elife-85878-supp-v1.zip]

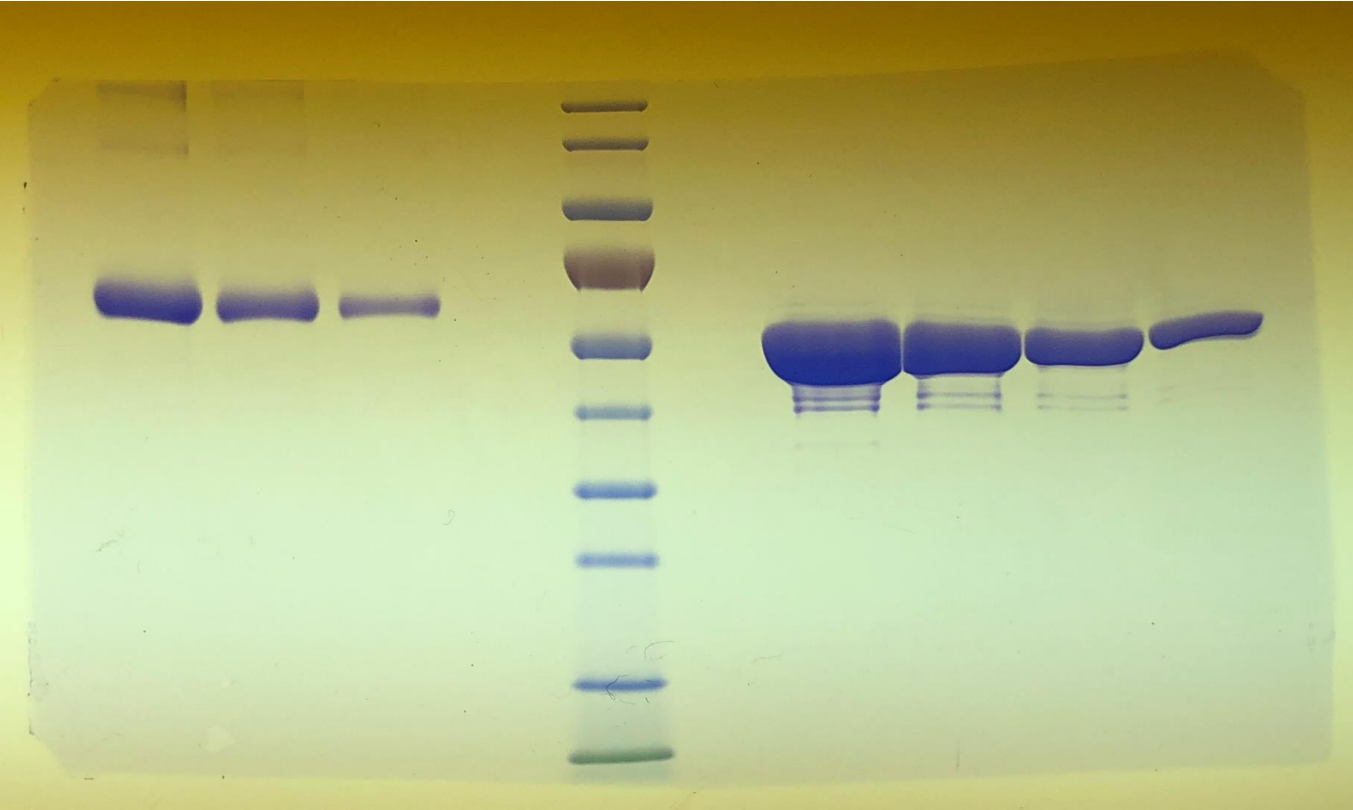

Supplement: supp [file elife-85878-supp-v1.zip]

Figure 4b

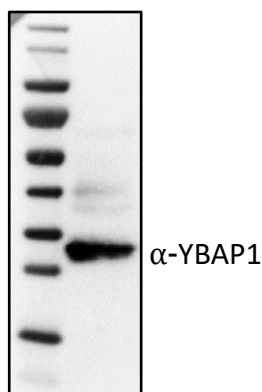

b1

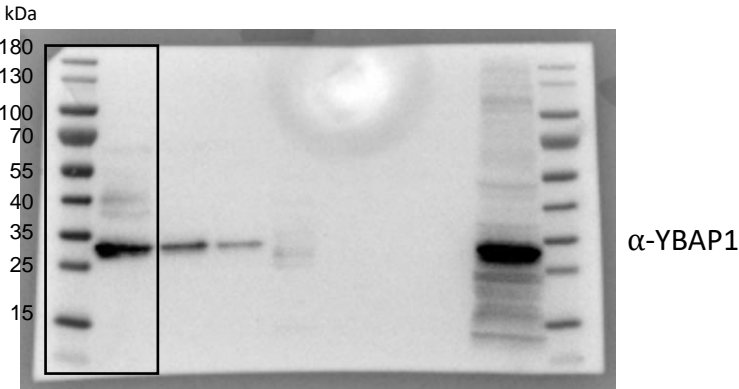

Supplement: supp [file elife-85878-supp-v1.zip]

Figure 3-figure supplement 1. miR223, but not miR190, enriched in mitochondria.

a.

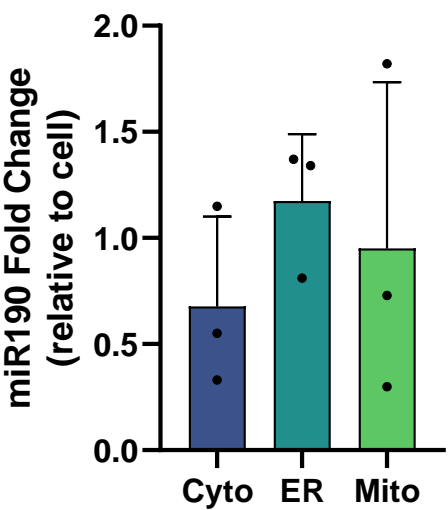

b.

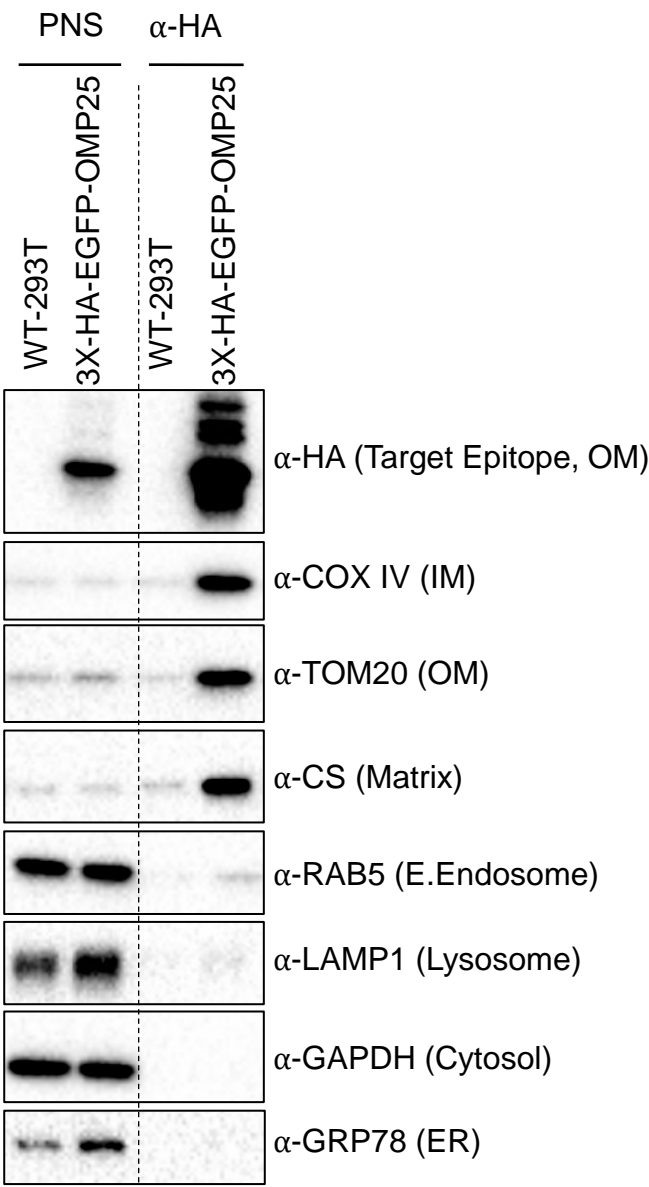

c.

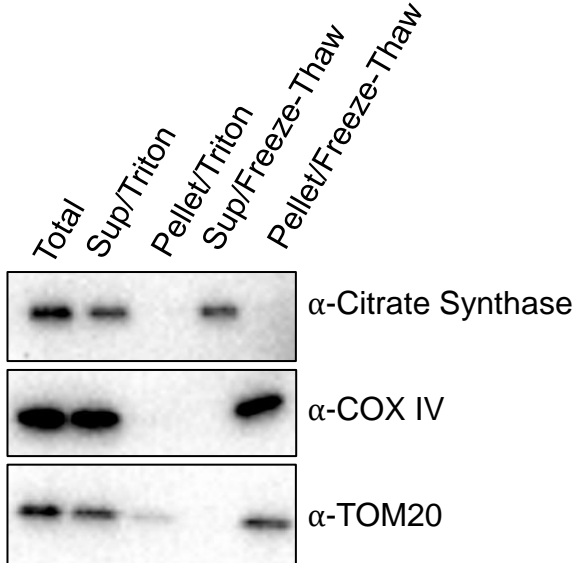

d.

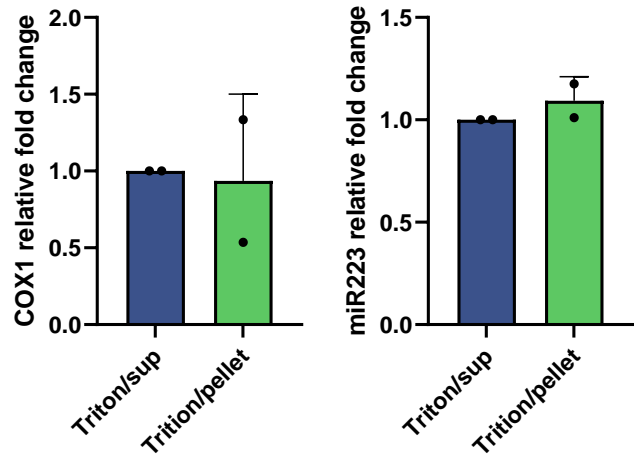

e.

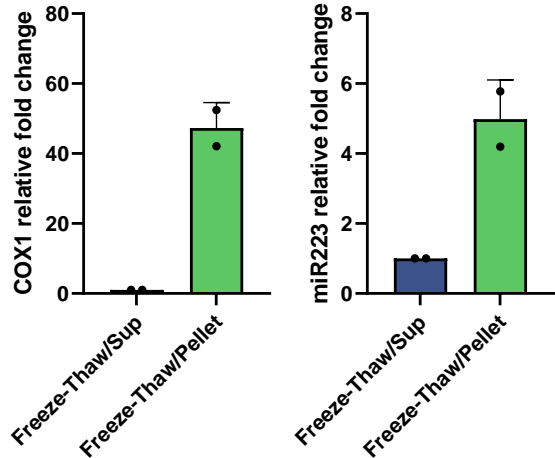

Supplement: supp [file elife-85878-supp-v1.zip]

Figure 1c.

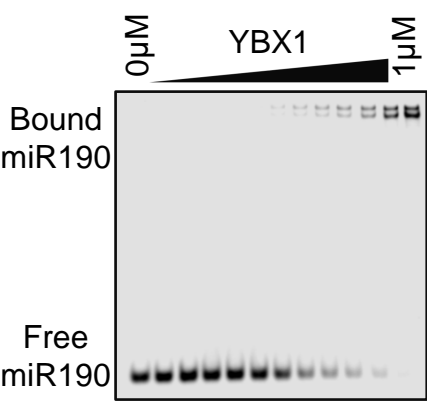

c1

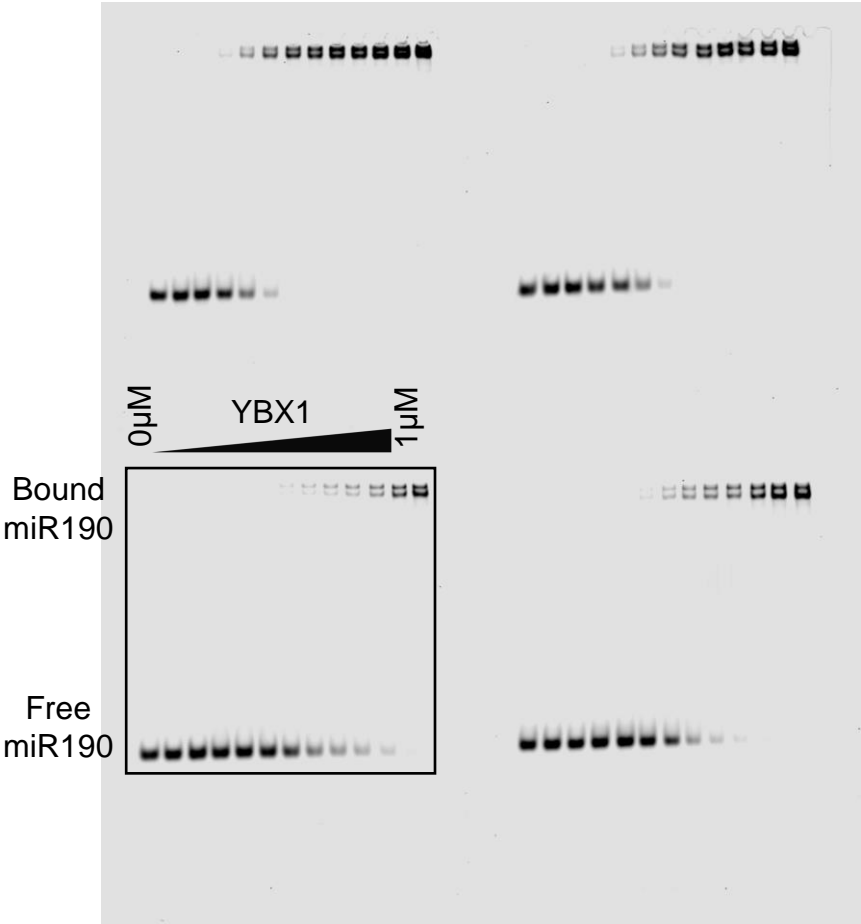

Supplement: supp [file elife-85878-supp-v1.zip]

Figure 3-figure supplement 2. Mitochondrial depletion did not change exosome secretion.

a.

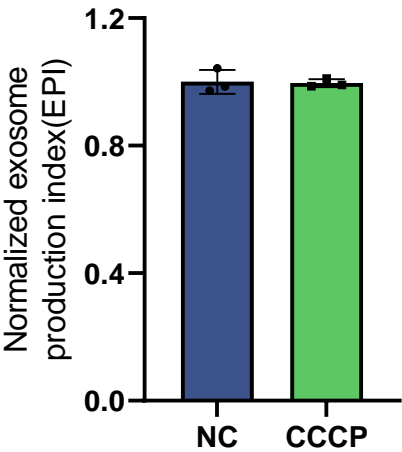

Supplement: supp [file elife-85878-supp-v1.zip]

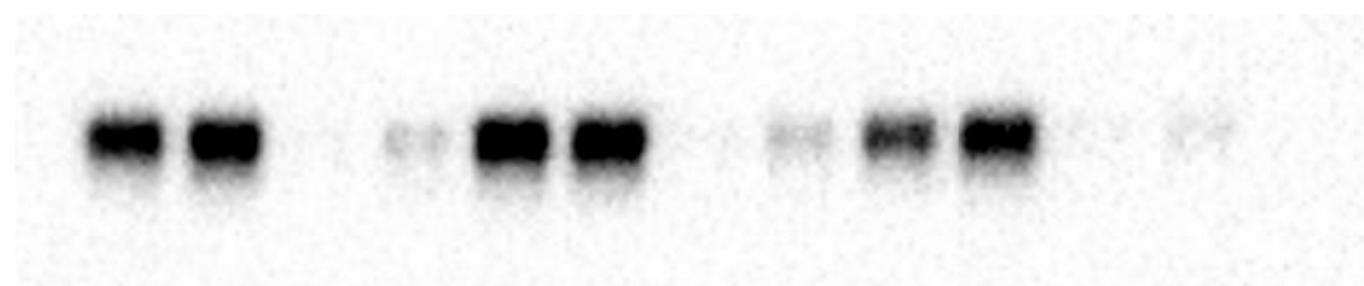

Supplement: supp [file elife-85878-supp-v1.zip]

Figure 2-figure supplement 1c.

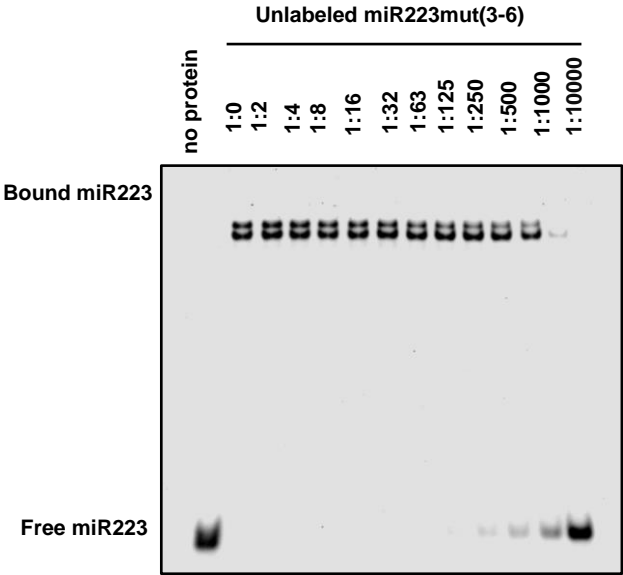

c1.

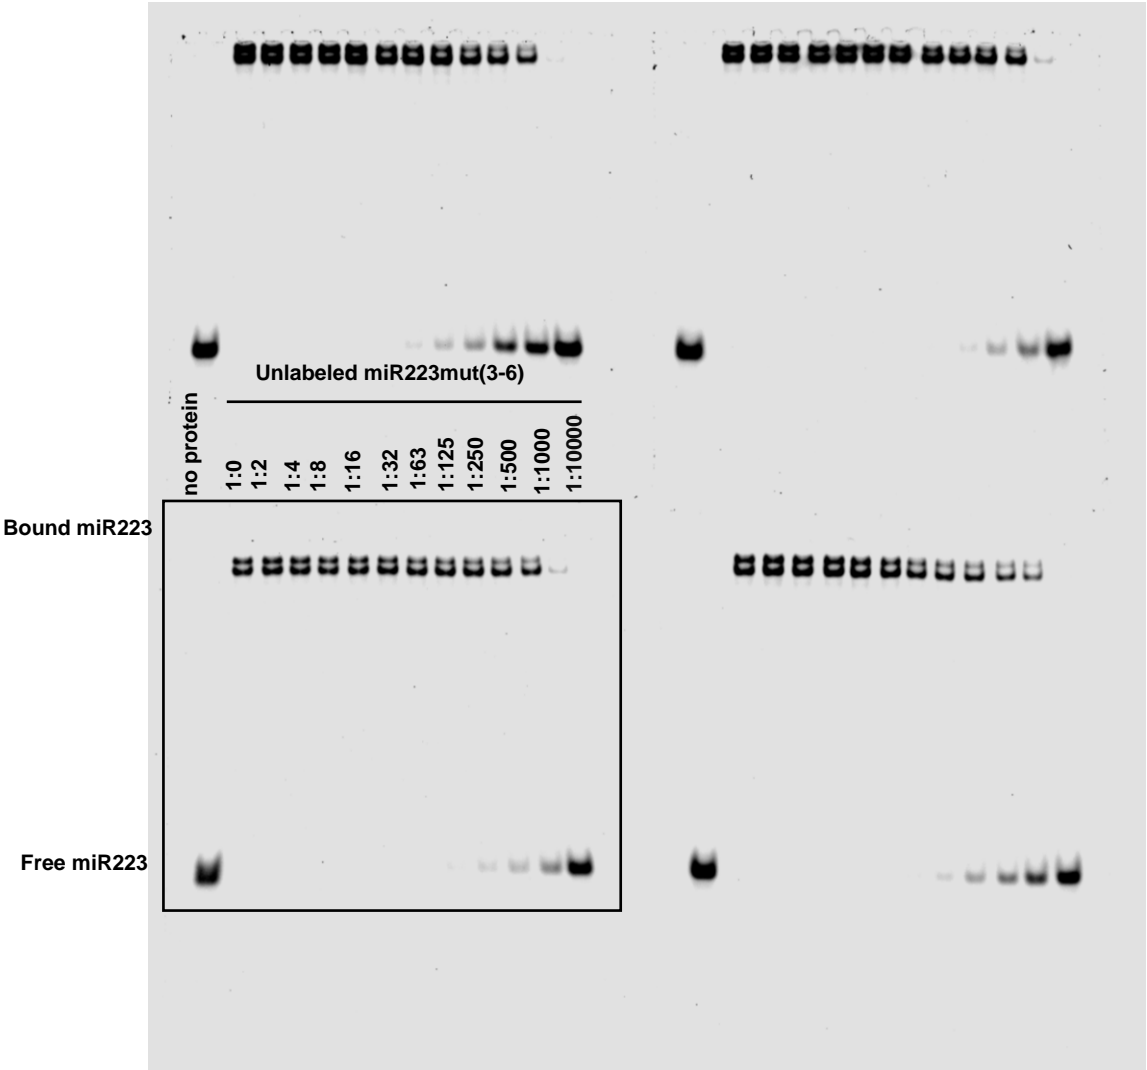

Supplement: supp [file elife-85878-supp-v1.zip]

Figure 3-figure supplement 1c

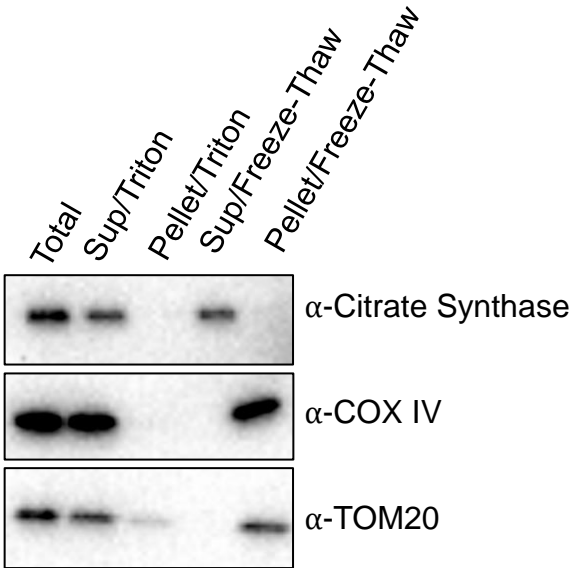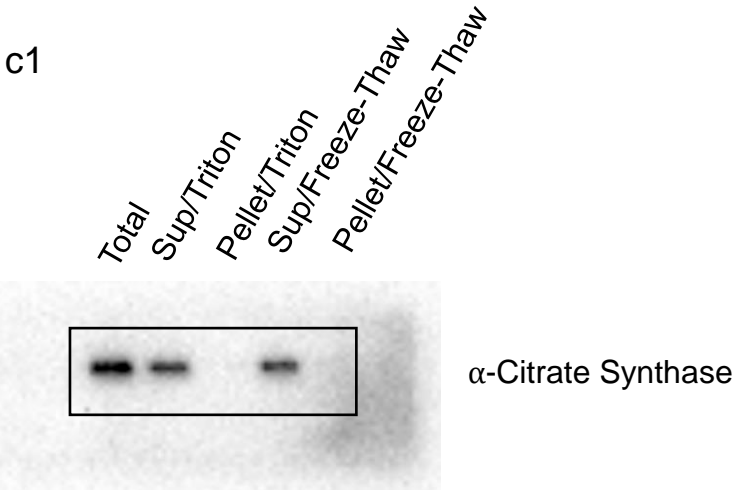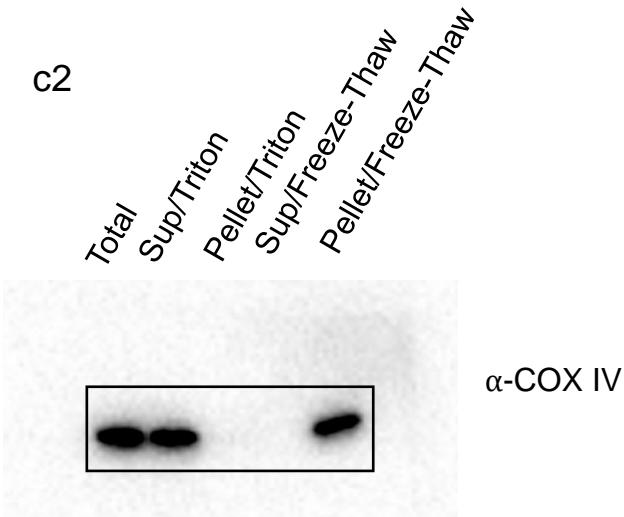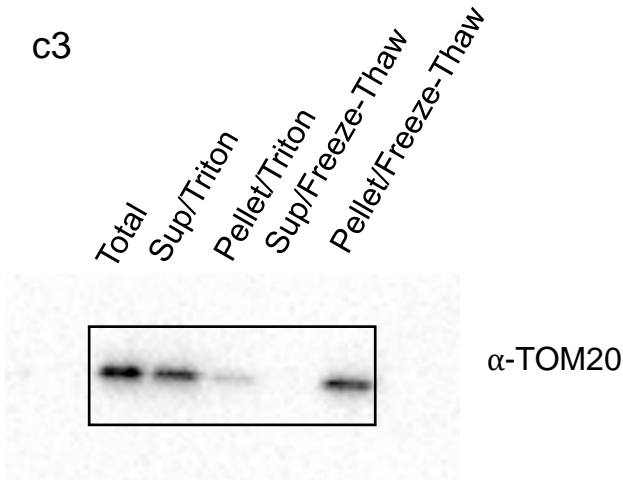

Supplement: supp [file elife-85878-supp-v1.zip]

Figure 4f

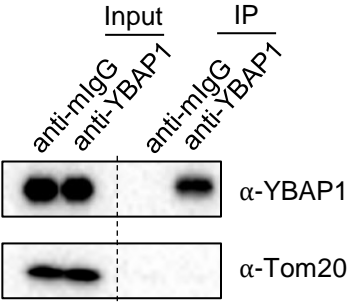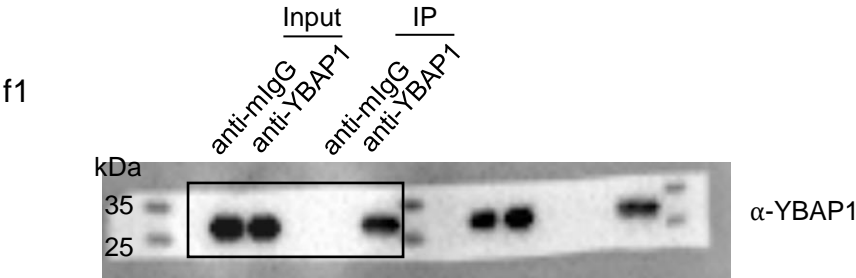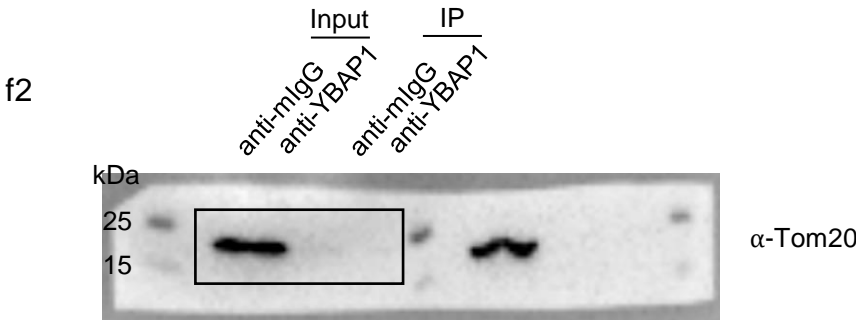

Supplement: supp [file elife-85878-supp-v1.zip]

Figure 4-figure supplement 1. YBX1 and YBAP1 copurify as a complex from transfected SF9 cells.

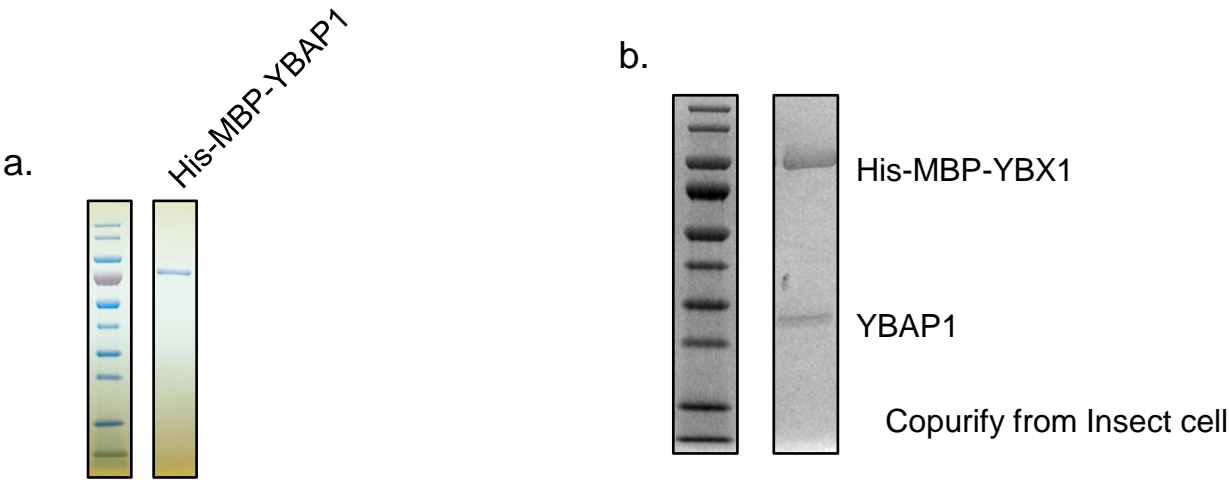

Supplement: supp [file elife-85878-supp-v1.zip › elife_poa_e85878_Figure_4_figure_supplement_1.pdf]

Figure 4-figure supplement 2. YBAP1 does not share the same motif as YBX1 that binds to miR223

a.

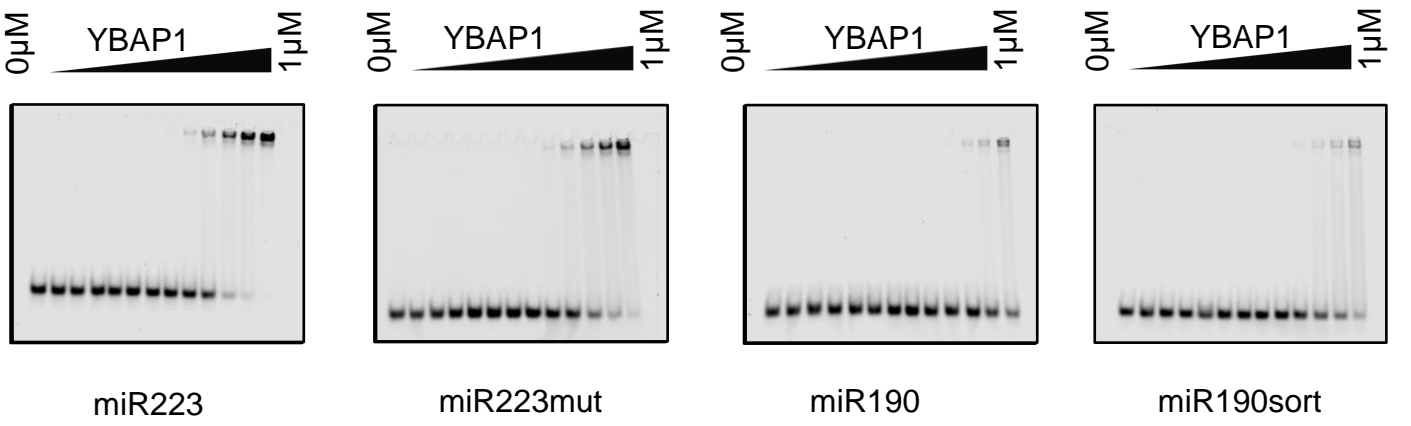

b.

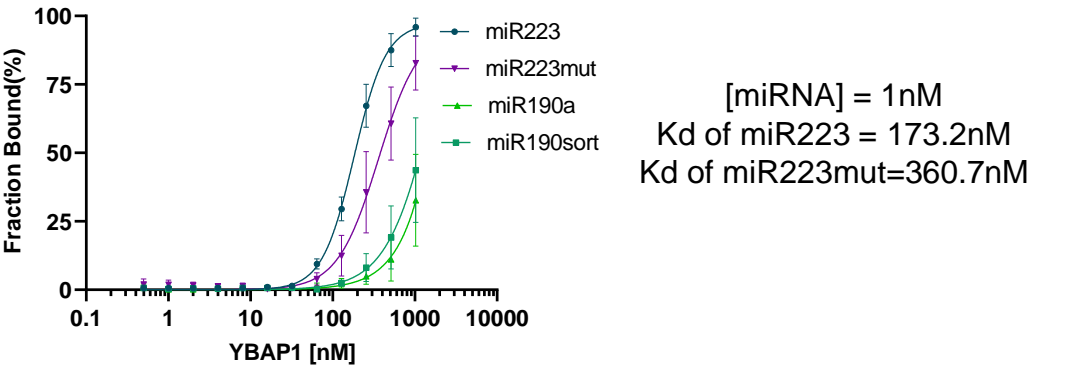

Supplement: supp [file elife-85878-supp-v1.zip › elife_poa_e85878_Figure_4_figure_supplement_2.pdf]

Figure 5-figure supplement 1. Knockout of YBAP1 did not change  
exosome secretion.

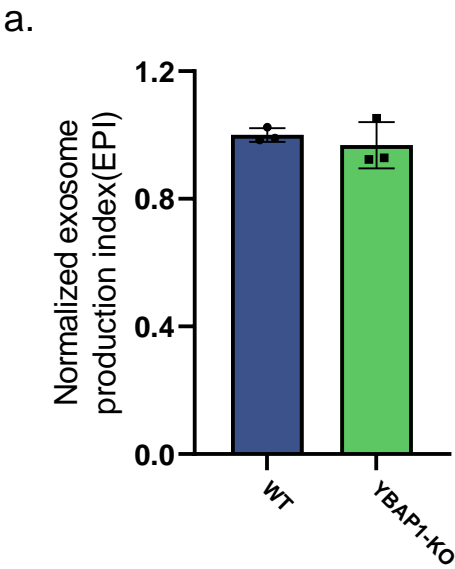

Supplement: supp [file elife-85878-supp-v1.zip › elife_poa_e85878_Figure_5_figure_supplement_1.pdf]

Figure 2-figure supplement 1e

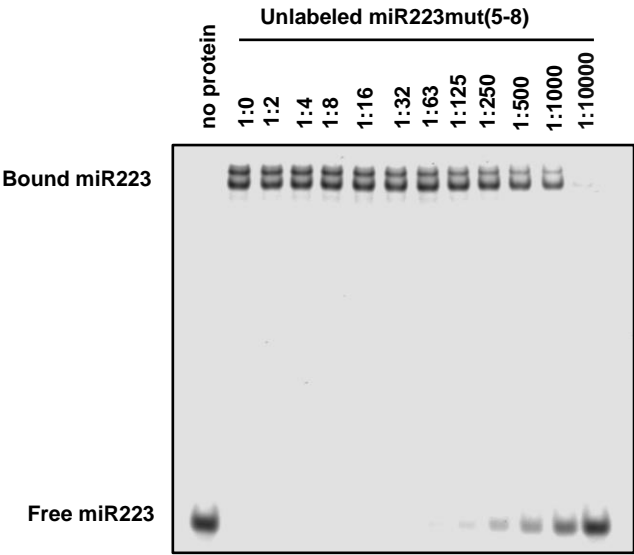

e1.

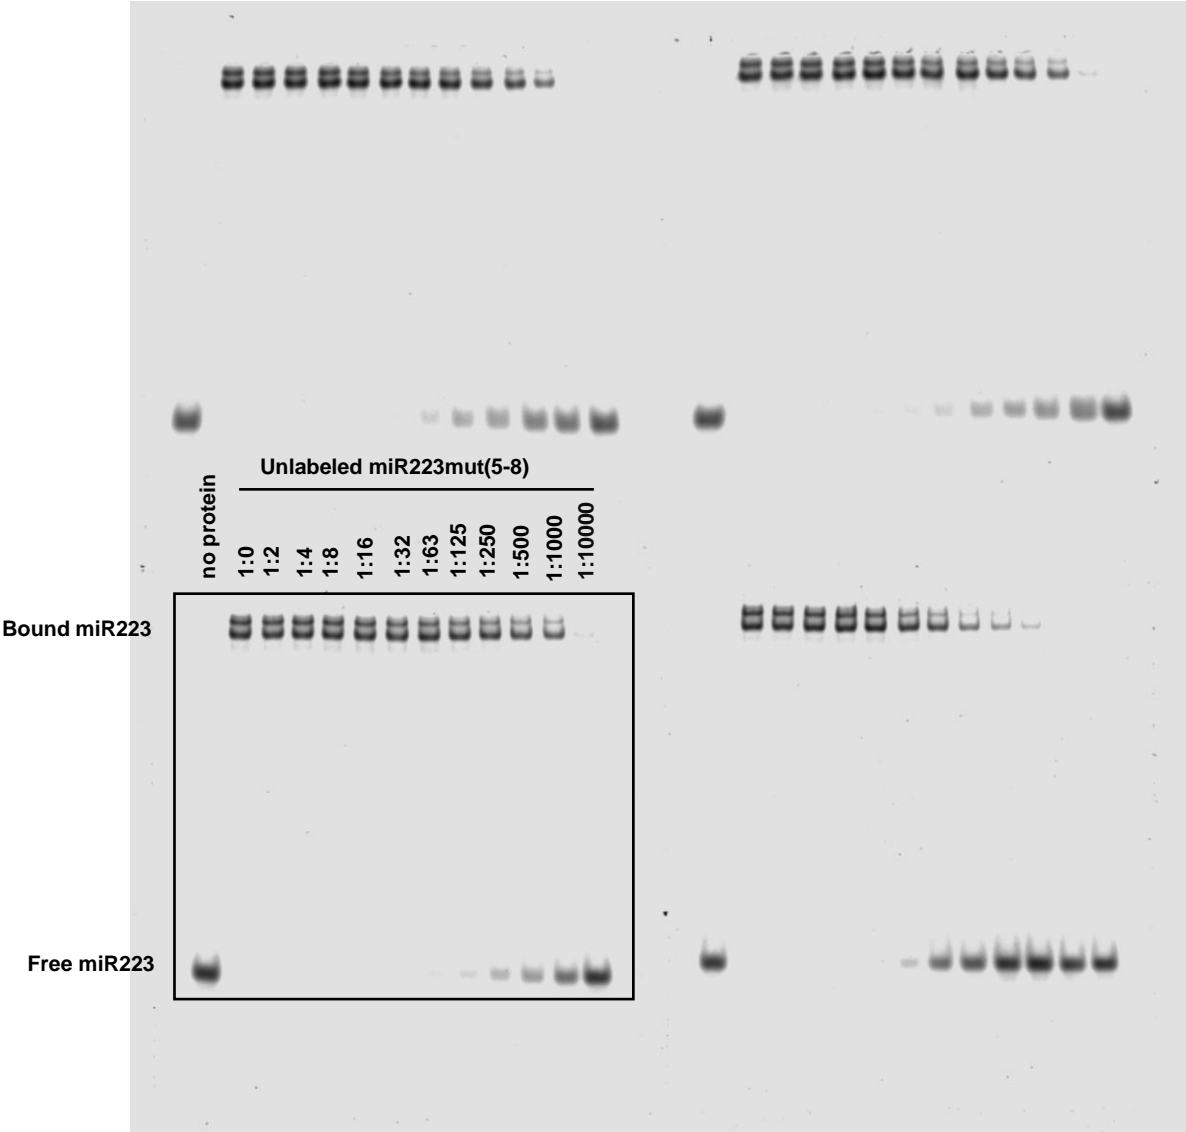

Supplement: supp [file elife-85878-supp-v1.zip]

Figure 4h

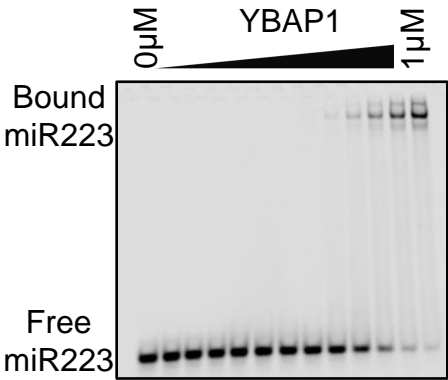

h1

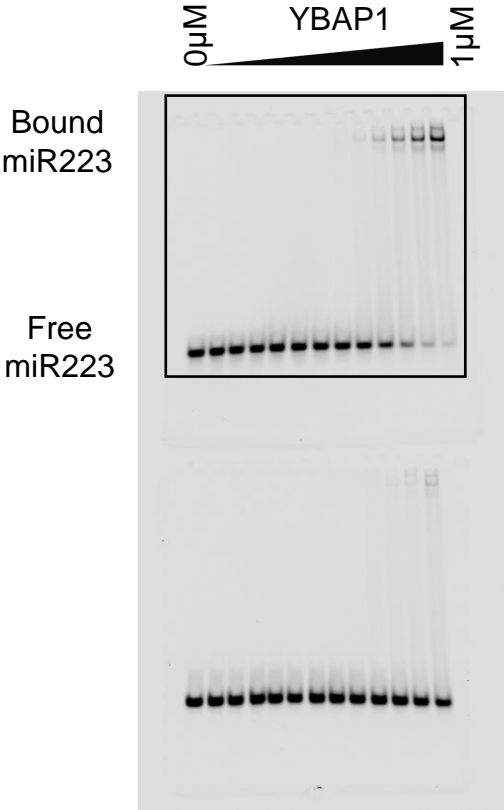

Supplement: supp [file elife-85878-supp-v1.zip]

Figure 4-figure supplement 2a

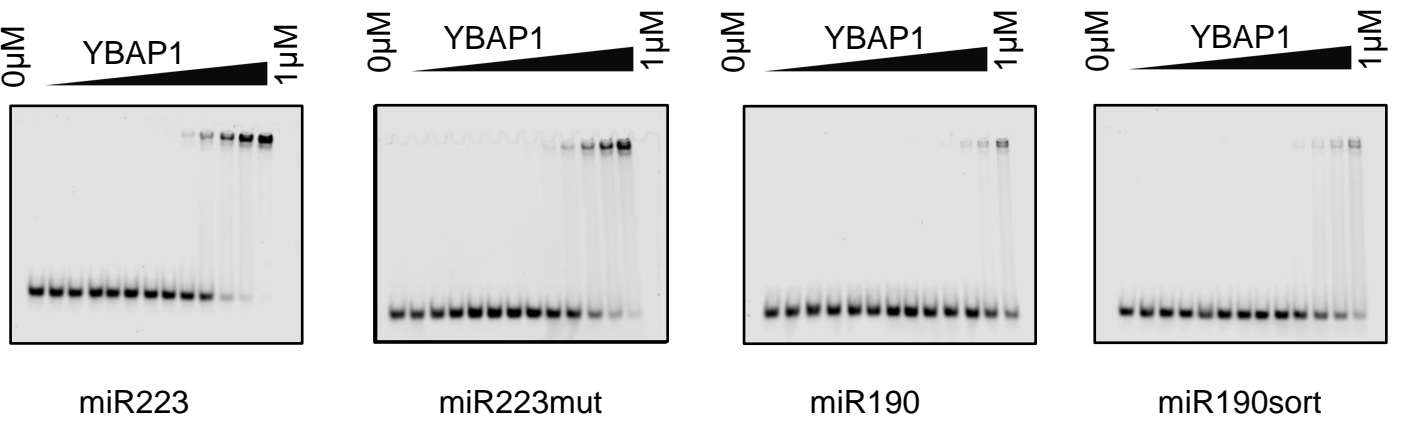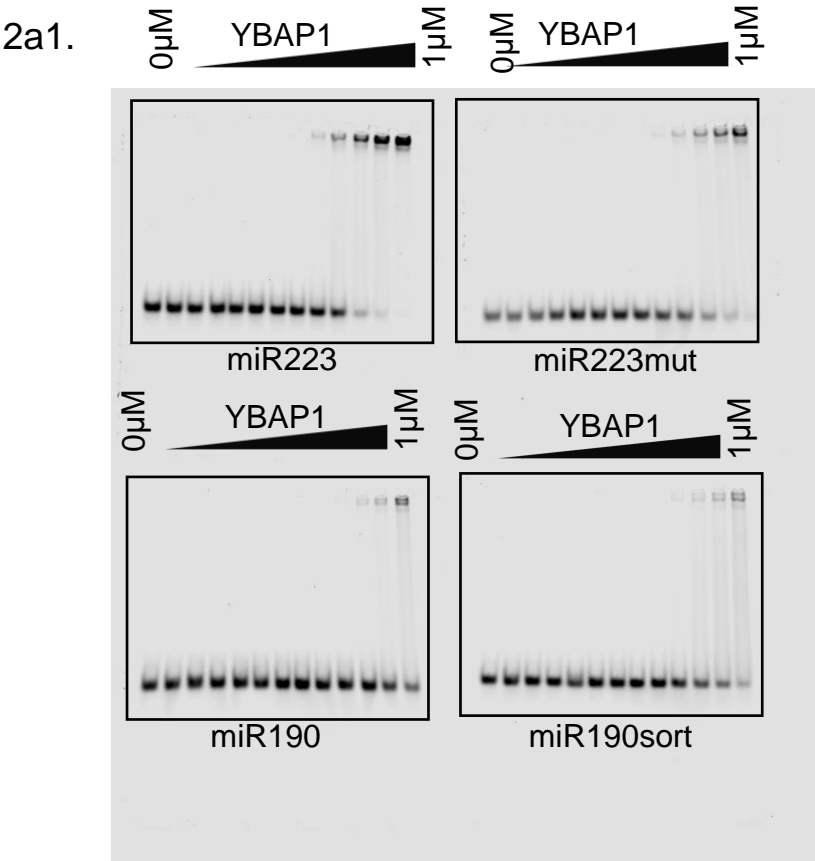

Supplement: supp [file elife-85878-supp-v1.zip]

Figure 1-figure supplement 2a.

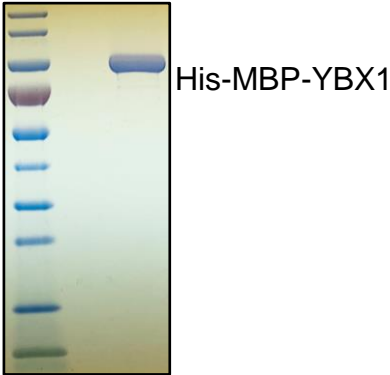

a1.

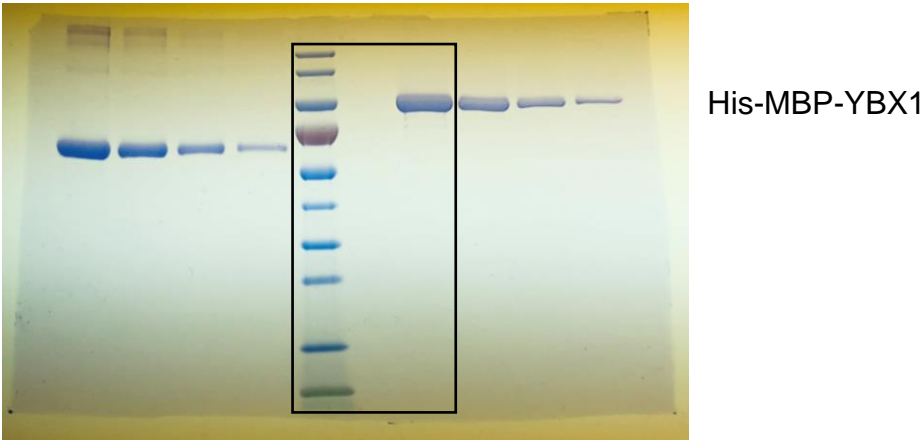

Supplement: supp [file elife-85878-supp-v1.zip]

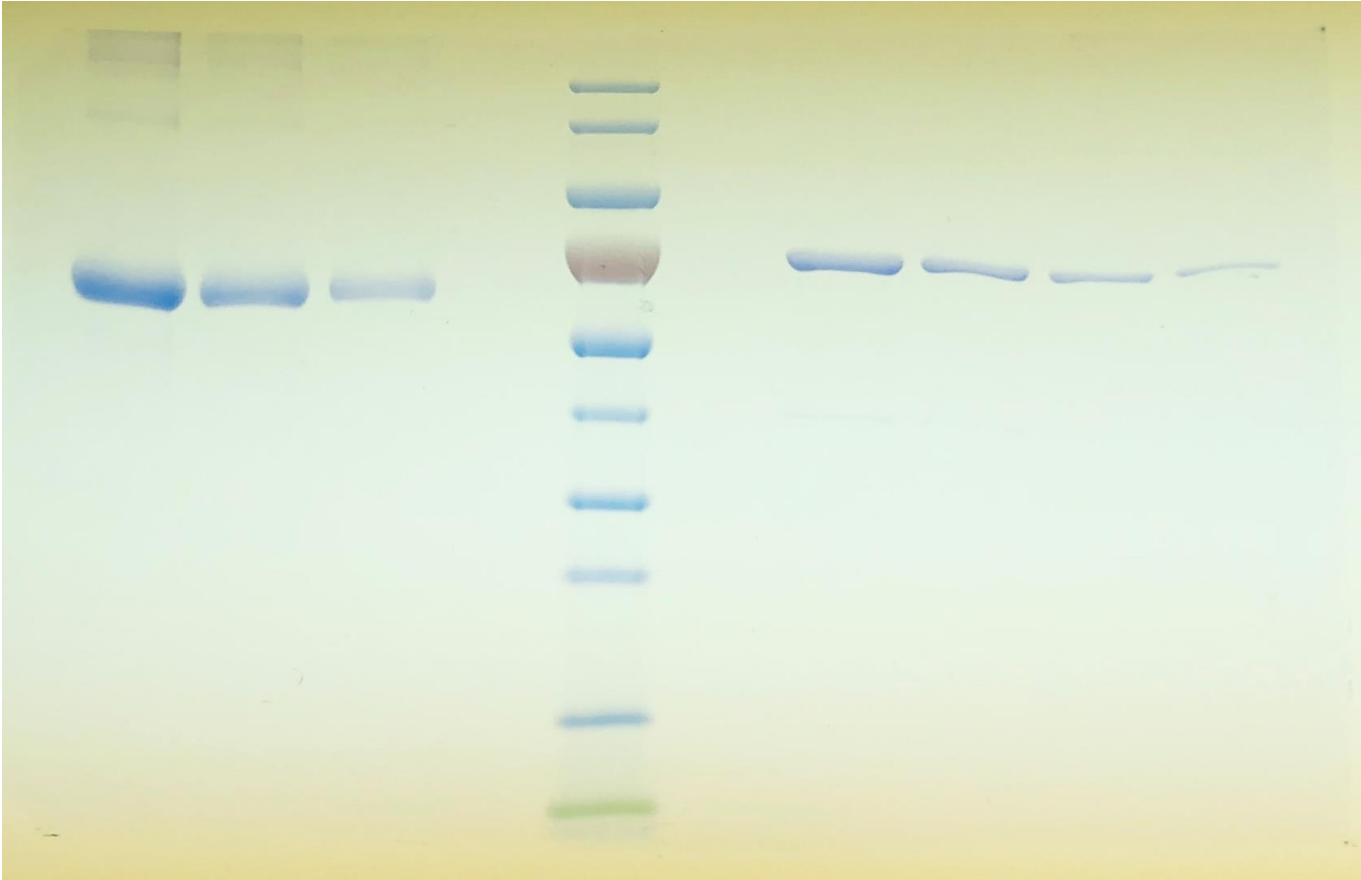

Supplement: supp [file elife-85878-supp-v1.zip]

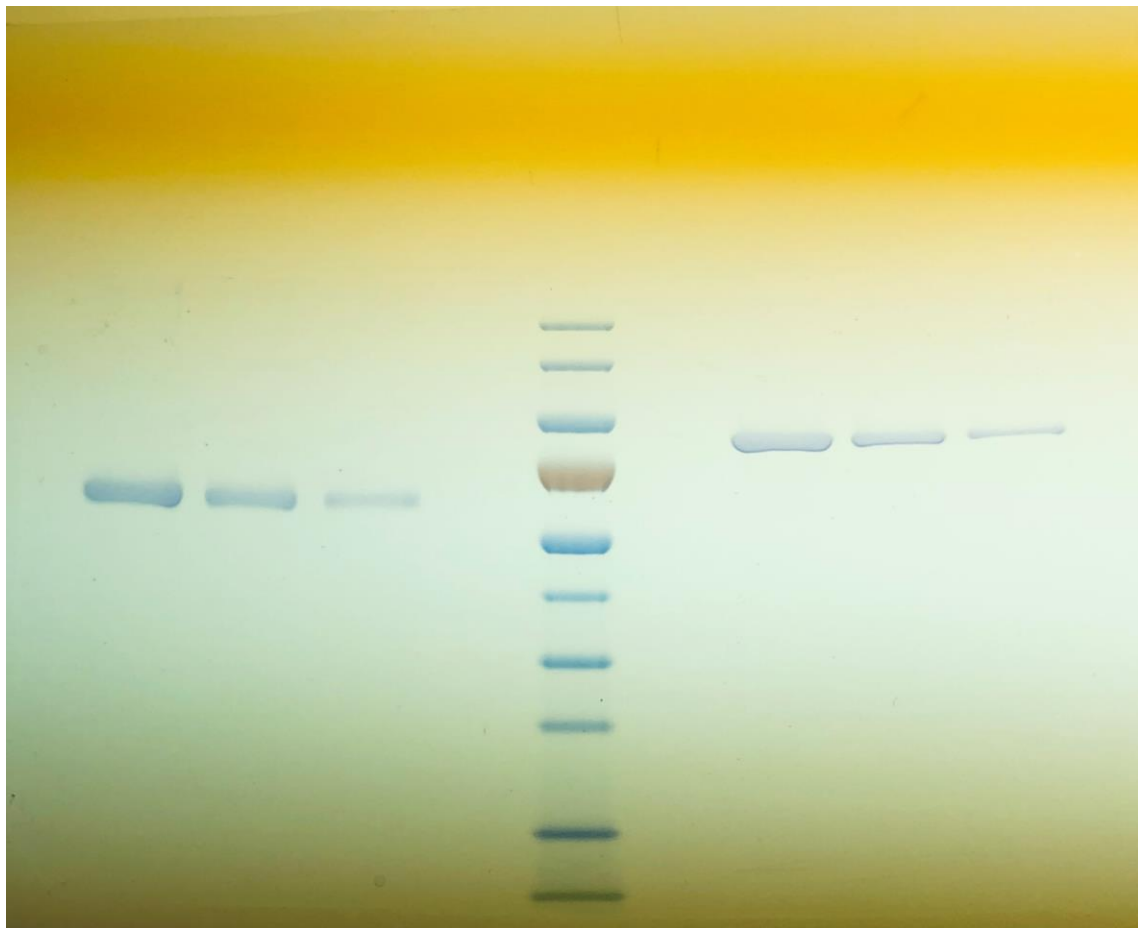

Supplement: supp [file elife-85878-supp-v1.zip]

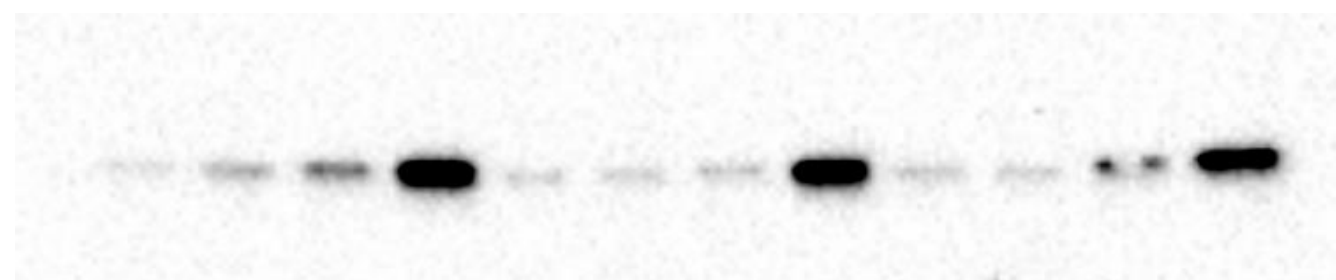

Supplement: supp [file elife-85878-supp-v1.zip]

Figure 1b.

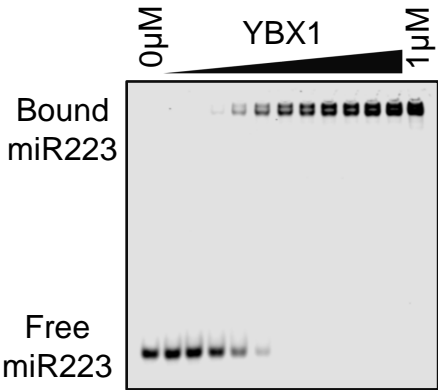

b1

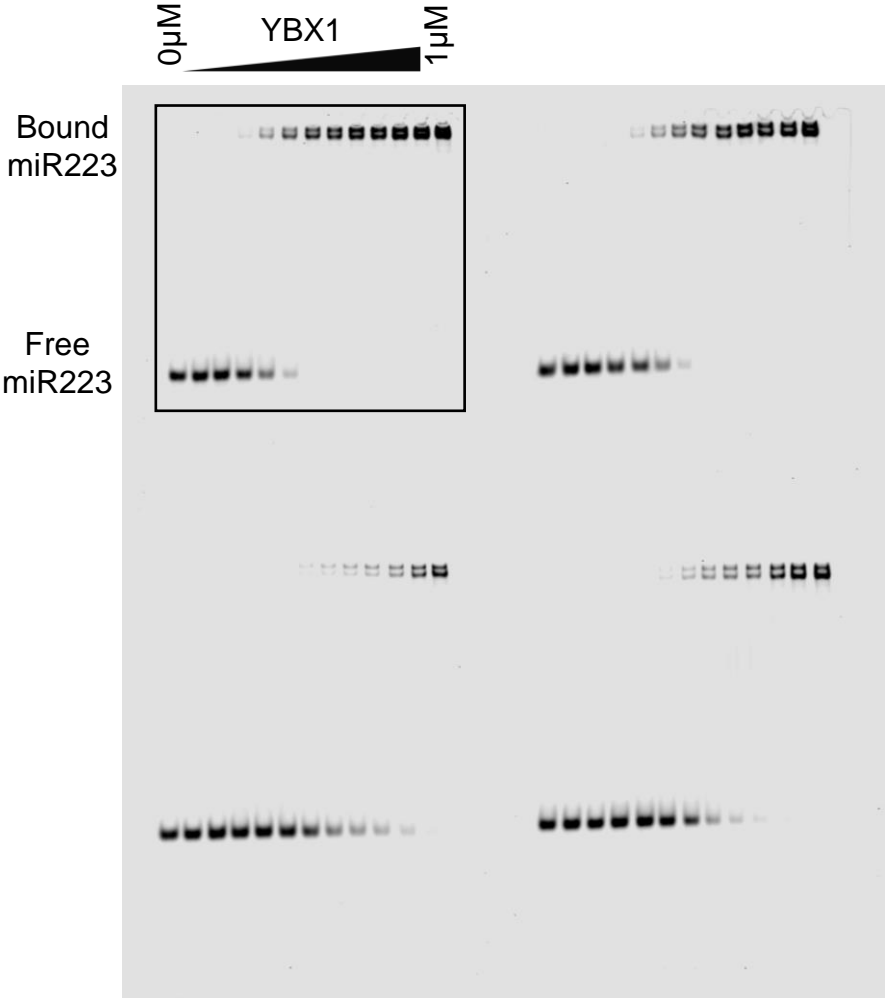

Supplement: supp [file elife-85878-supp-v1.zip]

Figure 1-figure supplement 2c.

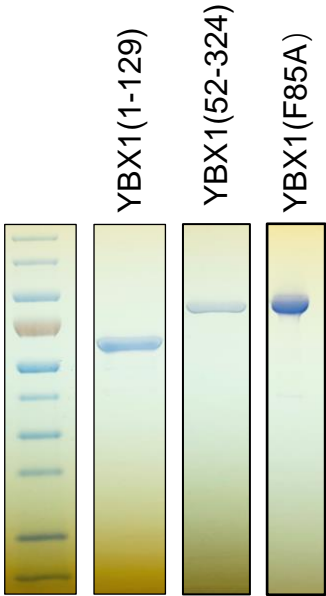

c1.

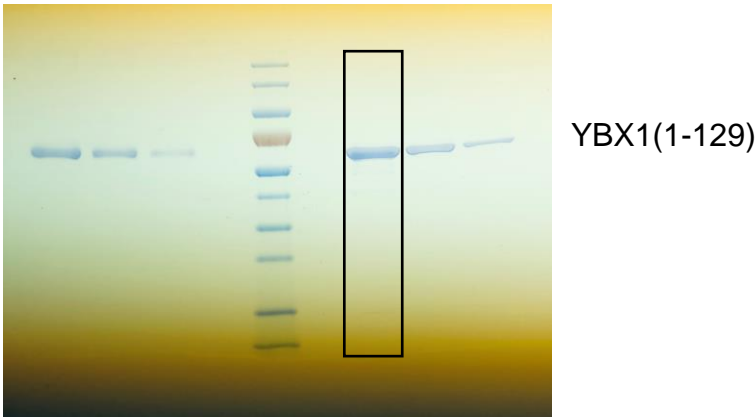

c2.

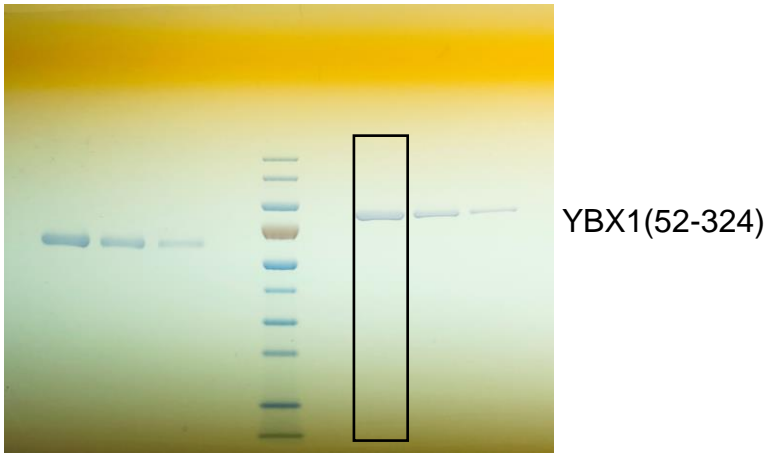

c3.

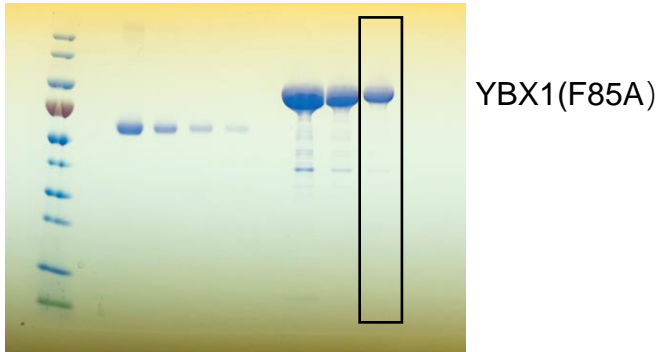

Supplement: supp [file elife-85878-supp-v1.zip]

Figure 4-figure supplement 1b

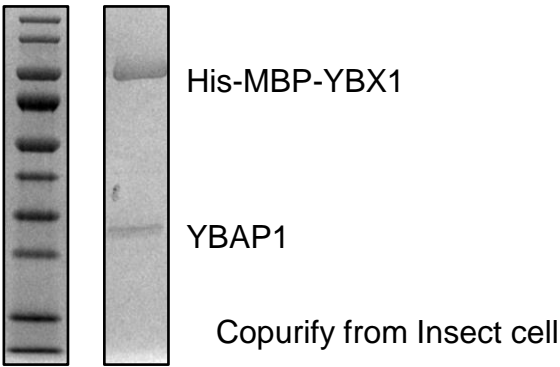

b1.

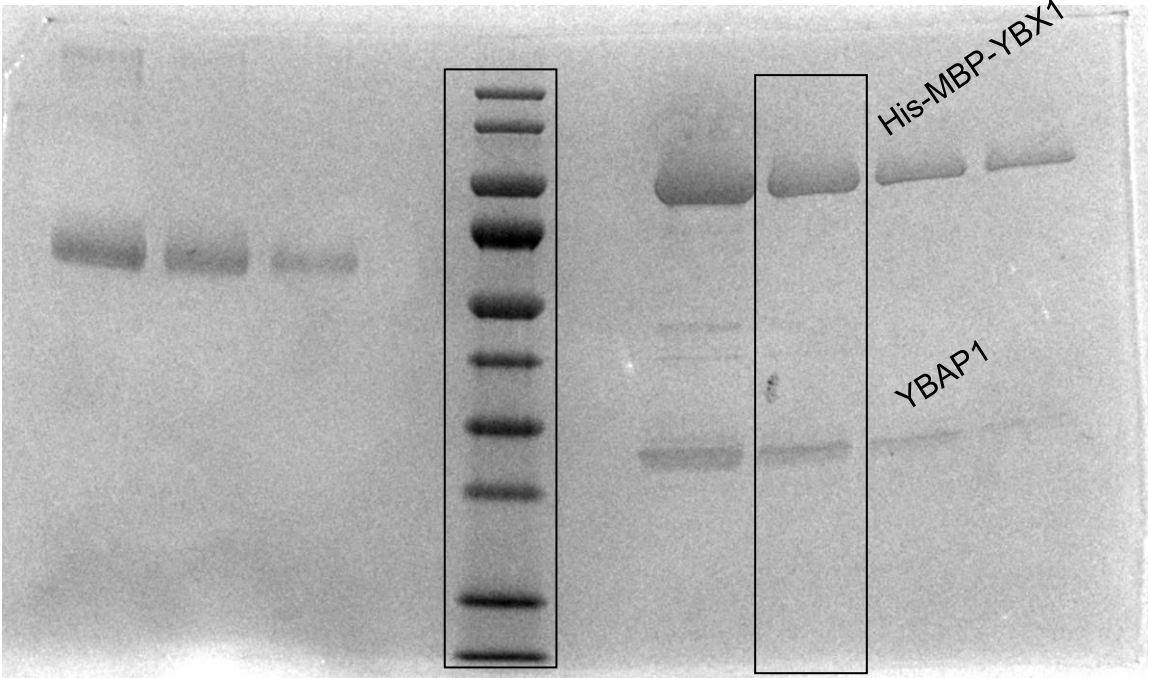

Supplement: supp [file elife-85878-supp-v1.zip]

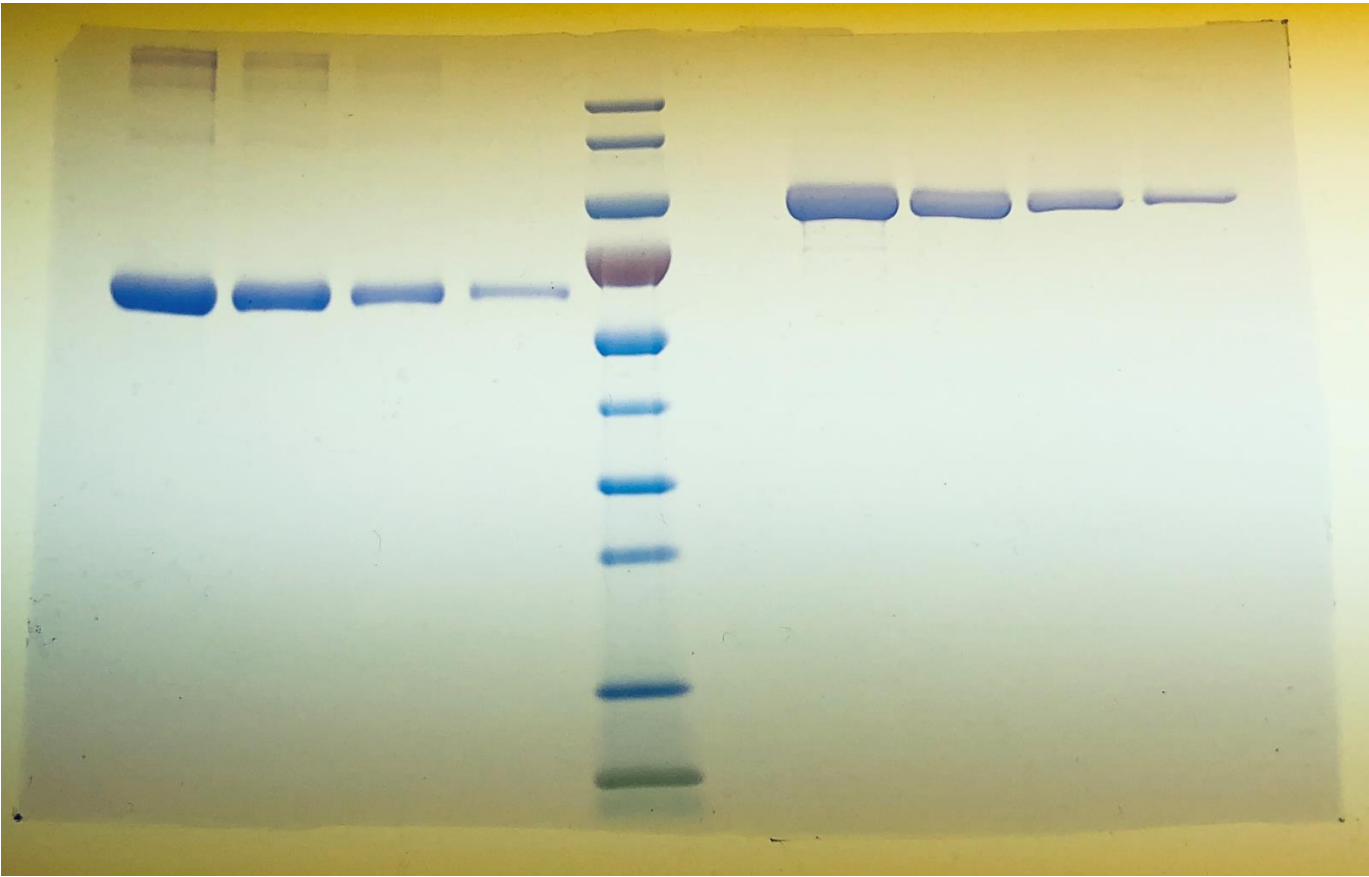

Supplement: supp [file elife-85878-supp-v1.zip]

Figure 3g.

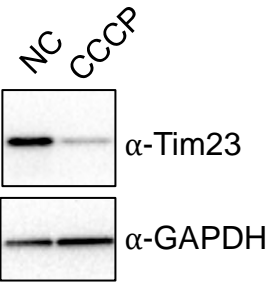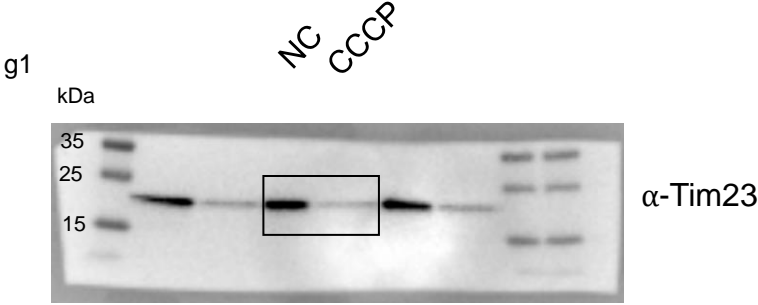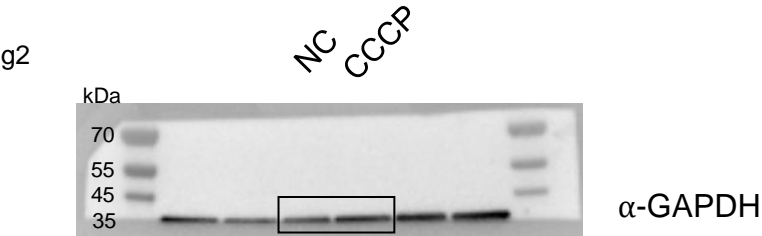

Supplement: supp [file elife-85878-supp-v1.zip]

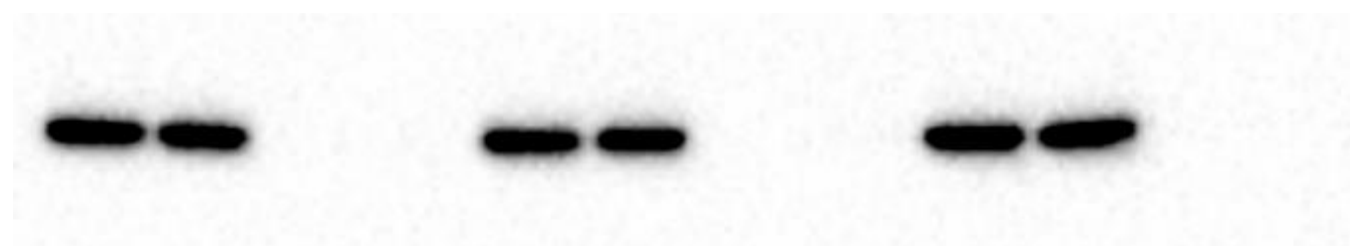

Supplement: supp [file elife-85878-supp-v1.zip]

Figure 1-figure supplement 2b.

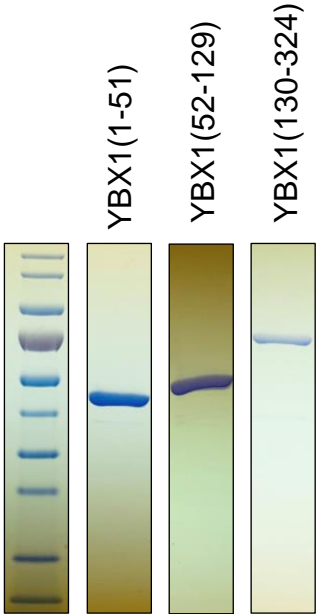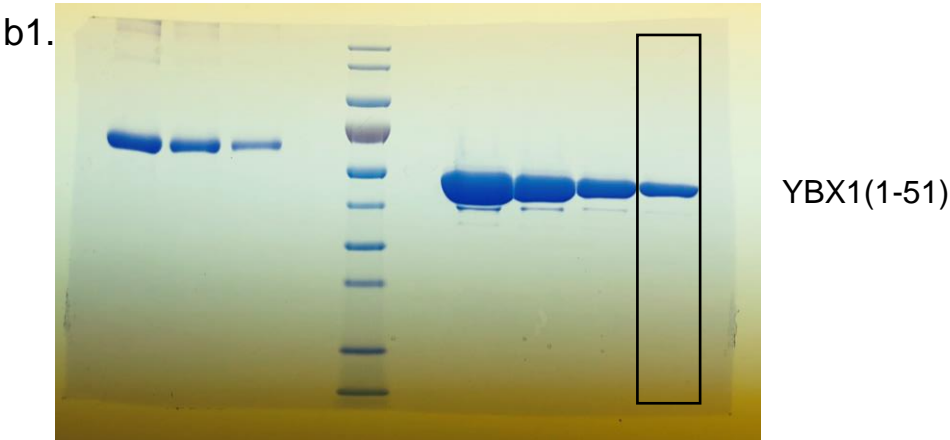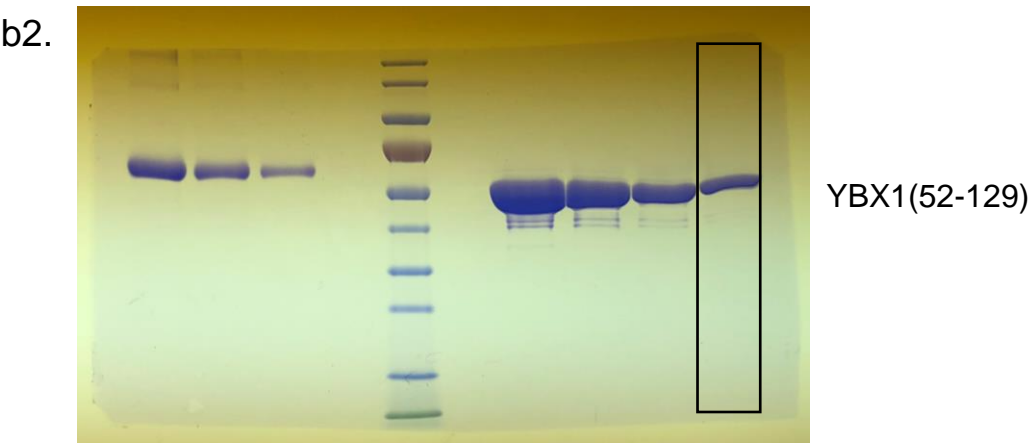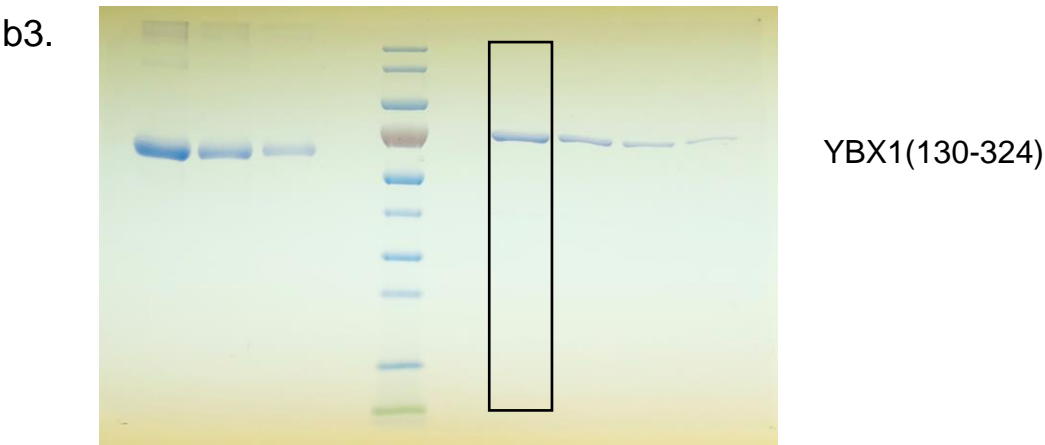

Supplement: supp [file elife-85878-supp-v1.zip]

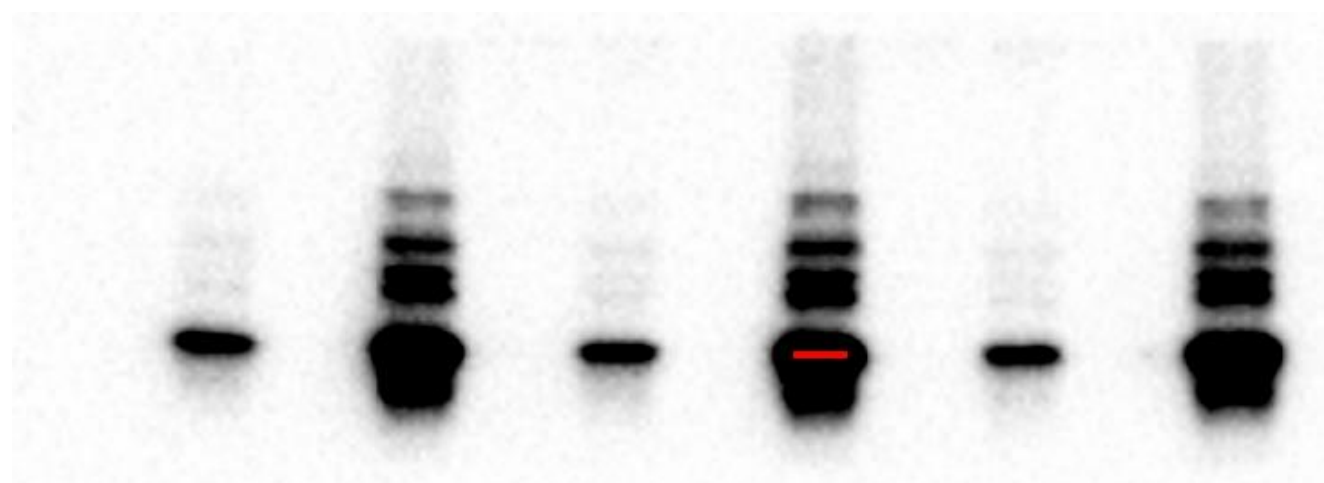

Supplement: supp [file elife-85878-supp-v1.zip]

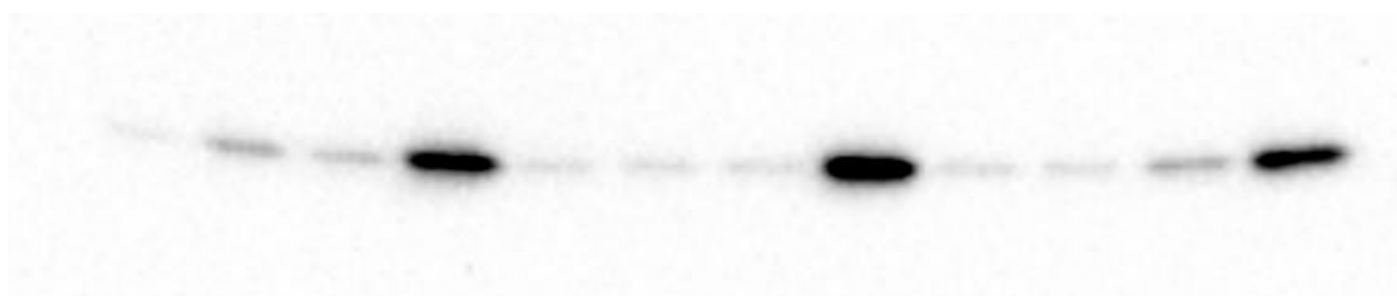

Supplement: supp [file elife-85878-supp-v1.zip]

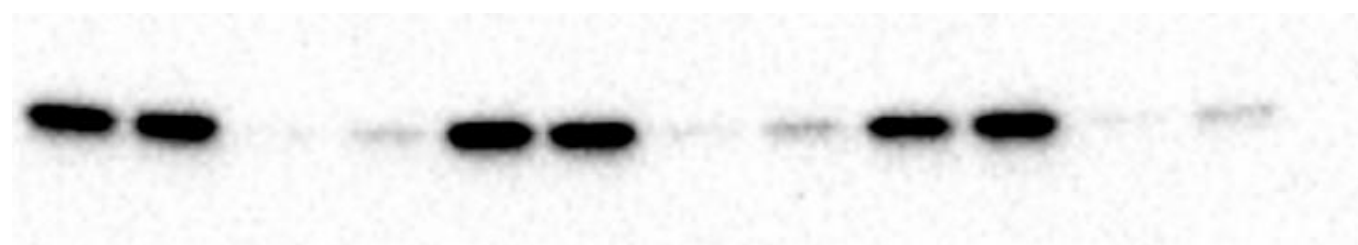

Supplement: supp [file elife-85878-supp-v1.zip]

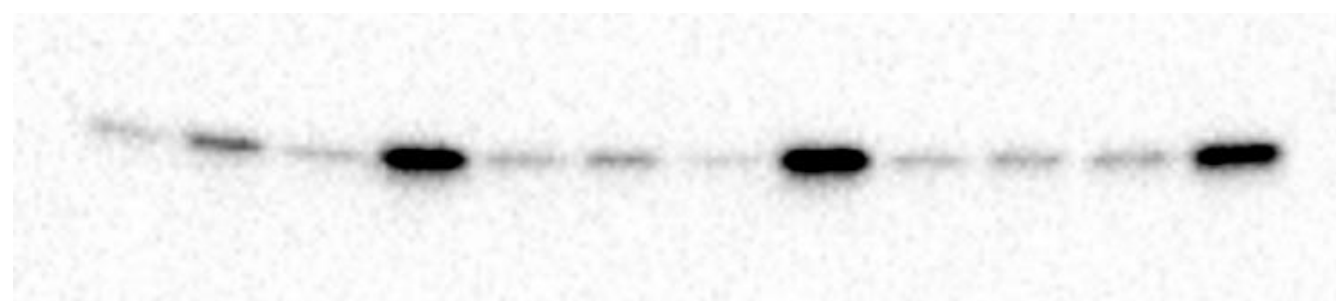

Supplement: supp [file elife-85878-supp-v1.zip]

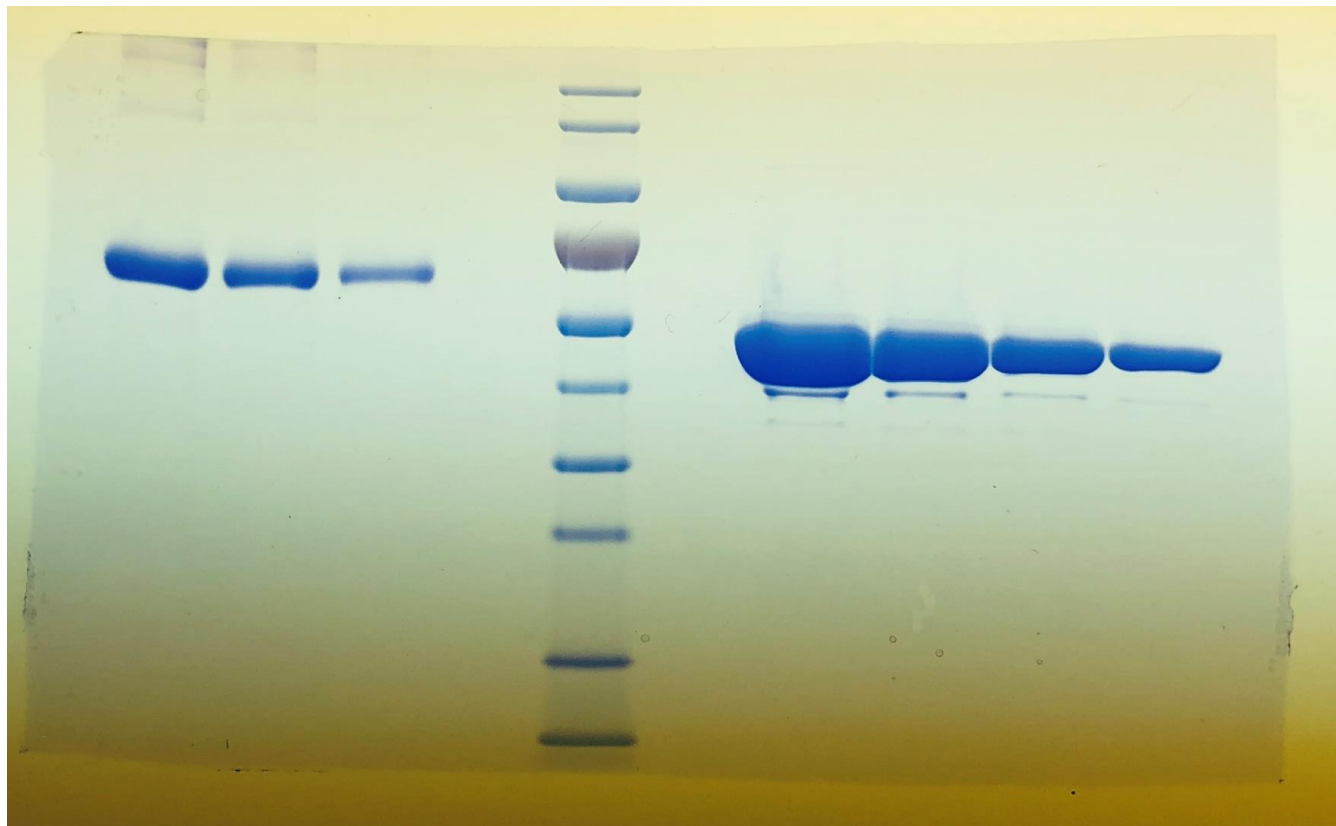

Supplement: supp [file elife-85878-supp-v1.zip]

Figure 2g.

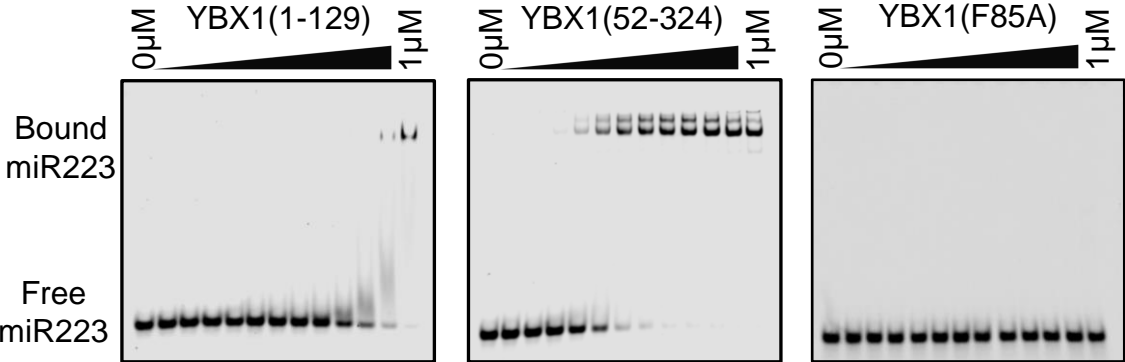

g1.

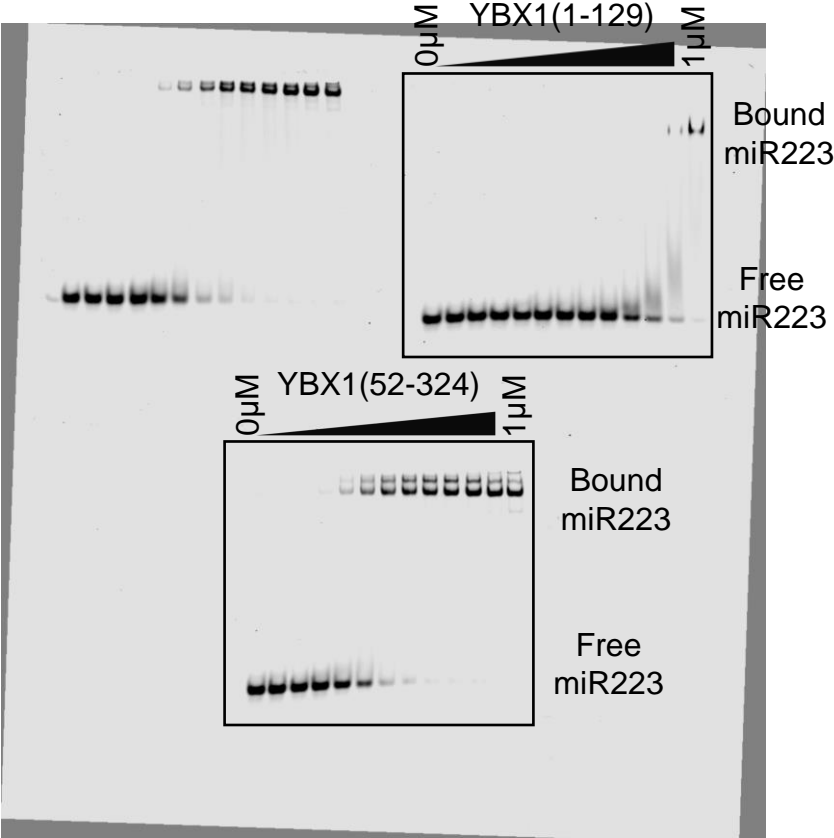

g2. 0  $\mu$ M YBX1(F85A) 1  $\mu$ M

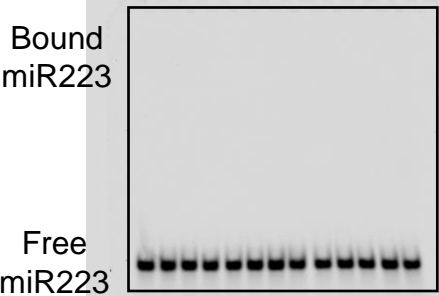

Supplement: supp [file elife-85878-supp-v1.zip]

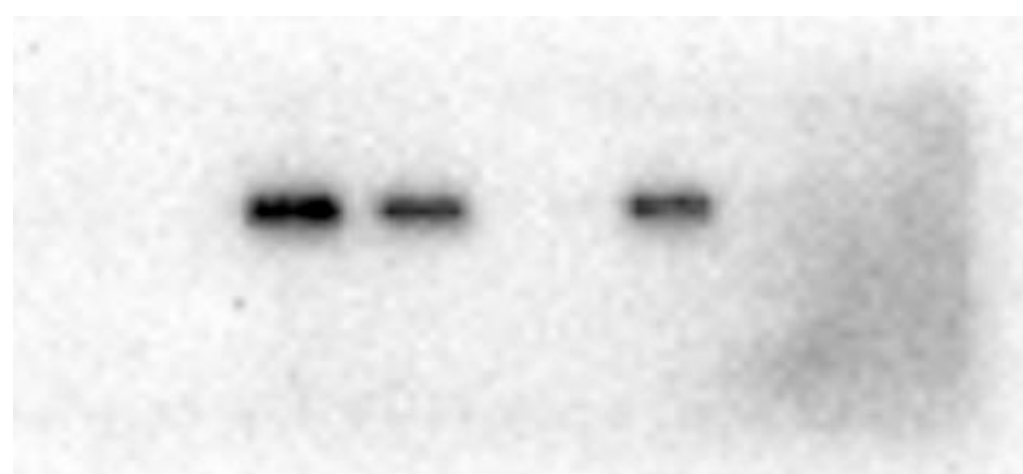

Supplement: supp [file elife-85878-supp-v1.zip]

Figure 4i

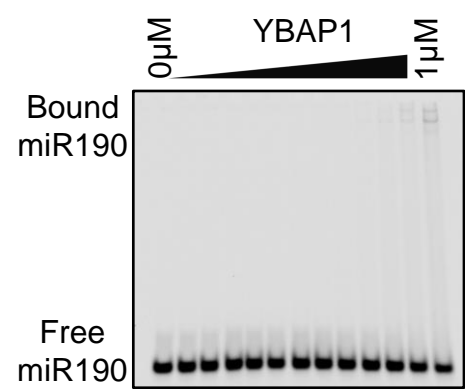

i1

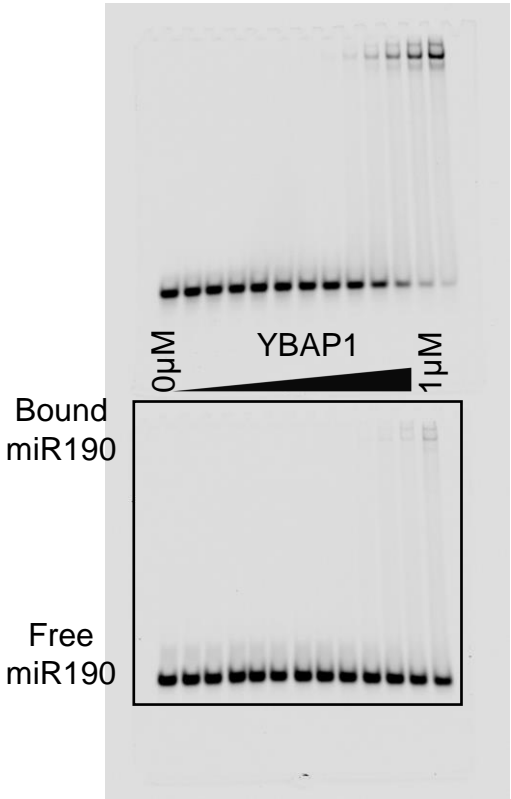

Supplement: supp [file elife-85878-supp-v1.zip]

Figure 2-figure supplement 1d

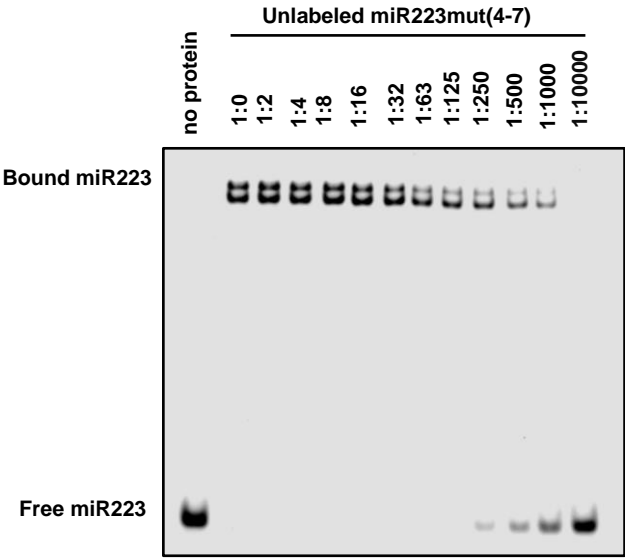

d1.

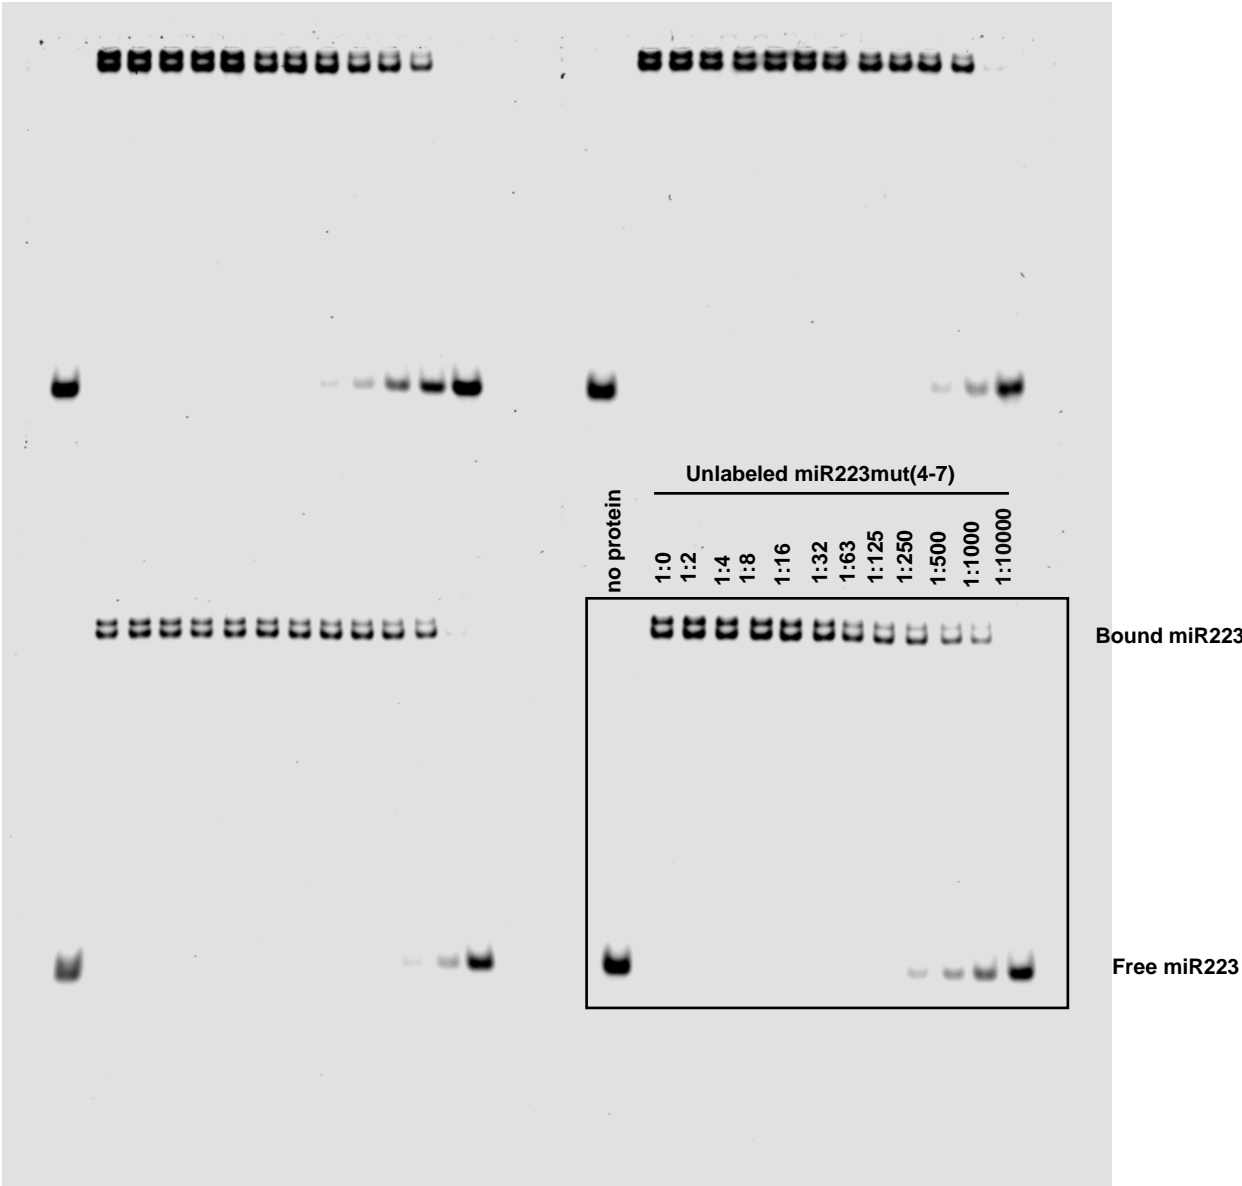

Supplement: supp [file elife-85878-supp-v1.zip]

Figure 3-figure supplement 1b

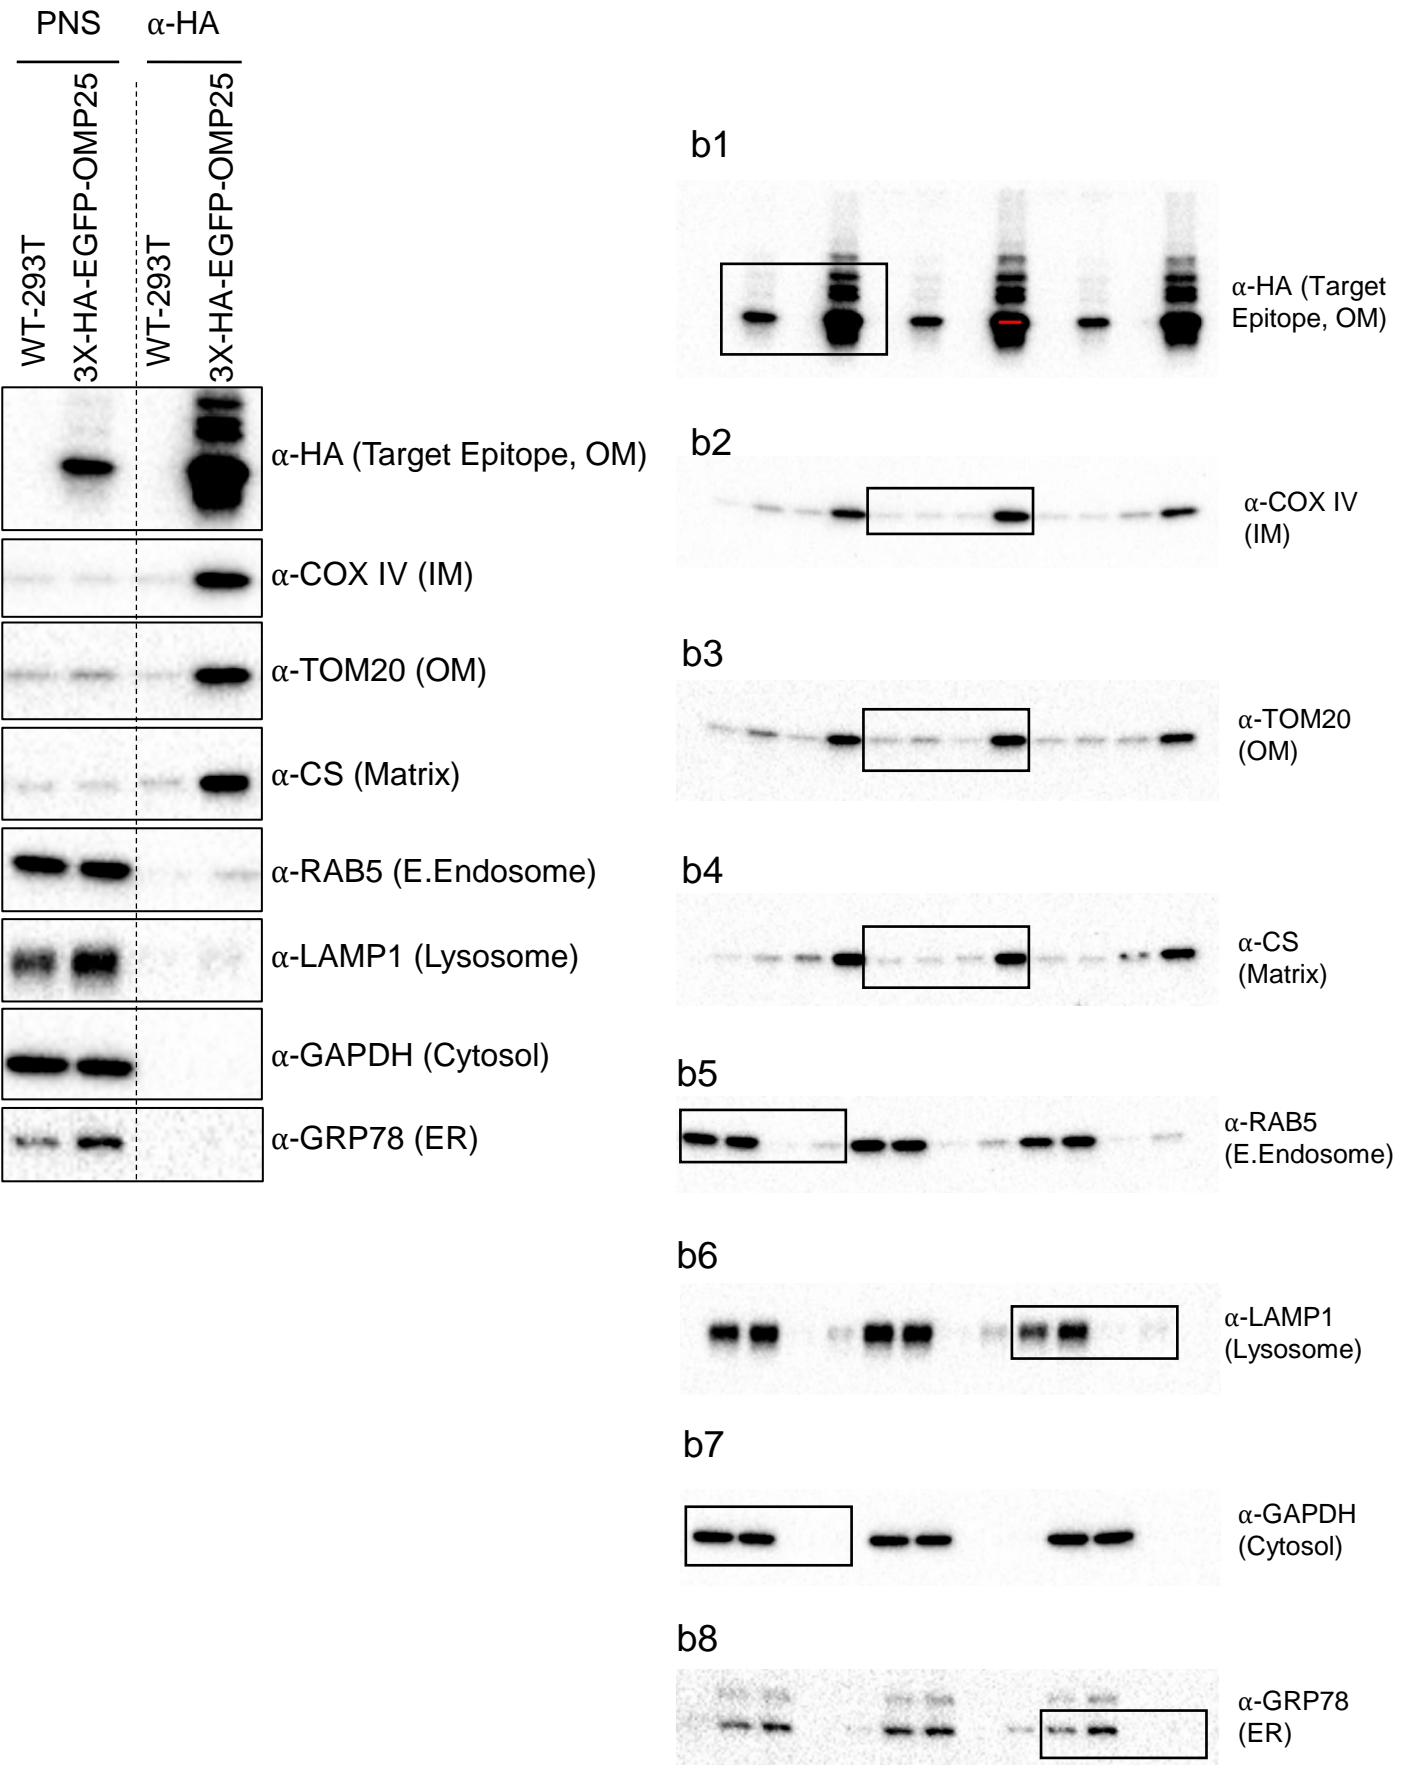

Supplement: supp [file elife-85878-supp-v1.zip]
